# Supplementary material
Source: publisher figshare collection journal article supplement (https://tandf.figshare.com/articles/dataset/_/6652289)
Supplement: Supplementary file 2 [file 2]

**Supplemental Table 1. Description of primers used for cloning, sequencing, conventional, and real time PCR**

| Oligo Name | *S or AS | Clone Names                                      | Sequence                                                     | **Nucleotide Position (nt) | Virus & Gene (or plasmid) |
|------------|----------|--------------------------------------------------|--------------------------------------------------------------|----------------------------|---------------------------|
| OTR 249    | S        | Universal Outer Primers                          | 5' cc gct agc CTT CGC GAT GTA CGG GCC AGA 3'                 | 204-224                    | pcDNA3                    |
| OTR 552    | AS       |                                                  | 5' cg act agt gat atc GTT CCC CTG GTC CCA T 3'               | 1885-1867                  | HYB MTV Gag               |
| OTR 984    | S        | ***<br>Primers for <i>in vitro</i> transcription | 5' cccaagcttAATACGACTCACTATAGGGCA ACA GTC CTA ATA TTC ACG 3' | 1173-1193                  | HYBMTV R (+1) start       |
| OTR 985    | AS       |                                                  | 5' aaaccgggTTCCCCTGGTCCCATAAG 3'                             | 1885-1867                  | HYBMTV Gag                |
| OTR 875    | S        | SL4-01                                           | 5' GGA GAA GAG ATG GGG GTC TCG GGC 3'                        | 1452-1490                  | HYBMTV U5 region          |
| OTR 876    | AS       |                                                  | 5' GAC CCC CAT CTC TTC TCC GTA GGC 3'                        | 1460-1446                  | HYBMTV U5 region          |
| OTR 877    | S        | SL4-02                                           | 5' GGA GAA GAG GAG CCA TTG GAA ATG GGG 3'                    | 1452-1490                  | HYBMTV U5 region          |
| OTR 878    | AS       |                                                  | 5' CCA ATG GCT CCT CTT CTC CGT AGG CGG 3'                    | 1482-1447                  | HYBMTV U5 region          |
| OTR 879    | S        | SL4-03                                           | 5' GTT ACG GTA TGG GGG TCT CGG GCT CA 3'                     | 1465-1502                  | HYBMTV U5 region          |
| OTR 880    | AS       |                                                  | 5' GAC CCC CAT ACC GTA ACC TAC CTC TTC 3'                    | 1493-1455                  | HYBMTV U5 region          |
| OTR 881    | S        | SL4-04                                           | 5' GAC AAG AGT ACG GTG AGC CAT TGG 3'                        | 1453-1482                  | HYBMTV U5 region          |
| OTR 882    | AS       |                                                  | 5' CAC CGT ACT CTT CTC CGT AGG CGG GAC 3'                    | 1473-1445                  | HYBMTV U5 region          |
| OTR 883    | S        | SL4-05                                           | 5' GTA GGT CCA TTG GAA ATG GGG GTC 3'                        | 1461-1493                  | HYBMTV U5 region          |
| OTR 884    | AS       |                                                  | 5' CCA ATG GAC CTA CCT CTT CTC CGT AGG C 3'                  | 1482-1446                  | HYBMTV U5 region          |
| OTR 889    | S        | SL4-06                                           | 5' GTT AAC GCT AGC ATG GGG GTC TCG GGC TCA AAA GG 3'         | 1485-1508                  | HYBMTV U5 region          |
| OTR 890    | AS       |                                                  | 5' CCC CAT GCT AGC GTT AAC ACC GTA ACC TAC CTC TTC TC 3'     | 1466-1453                  | HYBMTV U5 region          |
| OTR 891    | S        | SL4-07                                           | 5' GTT AAC TAC GGT GAG CCA TTG GAA ATG GGG 3'                | 1467-1490                  | HYBMTV U5 region          |
| OTR 892    | AS       |                                                  | 5' ACC GTA GTT AAC CTC TTC TCC GTA GGC GGG 3'                | 1459-1443                  | HYBMTV U5 region          |
| OTR 893    | S        | SL4-08                                           | 5' GTT AAC AAC CCA TTG GAA ATG GGG GTC TCG 3'                | 1476-1496                  | HYBMTV U5 region          |

|          |    |        |                                                             |                                          |                         |
|----------|----|--------|-------------------------------------------------------------|------------------------------------------|-------------------------|
| OTR 894  | AS |        | 5' CAA TGG GTT GTT AAC ACC TAC CTC TTC TCC GTA GGC 3'       | 1466-1446                                | HYBMTV<br>U5 region     |
| OTR 1247 | S  | SL4-09 | 5'GAG CCA TTG GAA ATG GGG 3'                                | 1473-1490                                | HYBMTV<br>UTR<br>region |
| OTR 1248 | AS |        | 5' CCC ATT TCC AAT GGC TCG TAA CCT ACC TCT TCT CC 3'        | 1489-1473,<br>deletion,<br>1469-1452     | HYBMTV<br>UTR<br>region |
| OTR 1249 | S  | SL4-10 | 5' GGG AGC TGC AGT CCC G 3'                                 | 1431-1446                                | HYBMTV<br>UTR<br>region |
| OTR 1250 | AS |        | 5' GGG ACT GCA GCT CCC GGT GAG TCC GTT CCG C 3'             | 1445-1431,<br>deletion ,<br>1427-1412    | HYBMTV<br>UTR<br>region |
| OTR 1251 | S  | SL4-11 | 5' TCT GGG AGC TGC AGT CCC G 3'                             | substitution,<br>1431-1446               | HYBMTV<br>UTR<br>region |
| OTR 1252 | AS |        | 5' GGG ACT GCA GCT CCC AGA GGT GAG TCC GTT CCG C 3'         | 1445-1431,<br>substitution,<br>1427-1412 | HYBMTV<br>UTR<br>region |
| OTR 1274 | S  | SL4-12 | 5' TCC CGC CTA CGG AGA A 3'                                 | 1441-1457                                | HYBMTV<br>UTR<br>region |
| OTR 1275 | AS |        | 5' TCT CCG TAG GCG GGA CTC CCT ATG GTG AGT CC3'             | 1456-1441,<br>deletion,<br>1435-1419     | HYBMTV<br>UTR<br>region |
| OTR 1030 | S  | SL4-13 | 5' CCC GCC TAC GTA GGT TAC GGT GAG CCA TTG G 3'             | 1443-1451,<br>Deletion,<br>1461-1482     | HYBMTV<br>U5 region     |
| OTR 1031 | AS |        | 5' CCG TAA CCT ACG TAG GCG GGA CTG CAG CTC C 3'             | 1471-1461,<br>Deletion,<br>1451-1432     | HYBMTV<br>U5 region     |
| OTR 1034 | S  | SL4-14 | 5' CCT CTT CTC GTA GGT TAC GGT GAG CCA TTG G 3'             | Substitution,<br>1461-1482               | HYBMTV<br>U5 region     |
| OTR 1035 | AS |        | 5' CCG TAA CCT ACG AGA AGA GGG TAG GCG GGA CTG CAG CTC C 3' | 1471-1461,<br>Substitution,<br>1451-1432 | HYBMTV<br>U5 region     |
| OTR 1253 | S  | SL4-15 | 5' GAG TGG CCA TTG GAA ATG GGG GTC 3'                       | substitution,<br>1476-1493               | HYBMTV<br>UTR<br>region |
| OTR 1254 | AS |        | 5' CCC CCA TTT CCA ATG GCC ACT CGT AAC CTA CCT CTT CTC C 3' | 1491-1476,<br>substitution,<br>1469-1452 | HYBMTV<br>UTR<br>region |

|          |    |                     |                                                             |                                                  |                                 |
|----------|----|---------------------|-------------------------------------------------------------|--------------------------------------------------|---------------------------------|
| OTR 1255 | S  | SL4-16              | 5' CCA CTC ATA GGG AGC TGC AGT CC 3'                        | 1428-1444                                        | HYBMTV UTR region               |
| OTR 1256 | AS |                     | 5' GGA CTG CAG CTC CCT ATG AGT GGT CCG TTC CGC TCT TGT G 3' | 1444-1428, substitution, 1421-1404               | HYBMTV UTR region               |
| OTR 1257 | S  | SL4-17              | 5' TTT GAG CCA TTG GAA ATG GG 3'                            | 1472-1489                                        | HYBMTV UTR region               |
| OTR 1258 | AS |                     | 5' CCA TTT CCA ATG GCT CAA AGT AAC CTA CCT CTT CTC C 3'     | 1488-1472, substitution, 1469-1452               | HYBMTV UTR region               |
| OTR 1259 | S  | SL4-18              | 5' AA ATA GGG AGC TGC AGT CC 3'                             | 1428-1444                                        | HYBMTV UTR region               |
| OTR 1260 | AS |                     | 5' GGA CTG CAG CTC CCT ATT TTG AGT CCG TTC CGC TCT T 3'     | 1444-1428, substitution, 1425-1408               | HYBMTV UTR region               |
| OTR 1261 | S  | SL4-19              | 5' ATG AGC CAT TGG AAA TGG G 3'                             | 1472-1489                                        | HYBMTV UTR region               |
| OTR 1262 | AS |                     | 5' CCA TTT CCA ATG GCT CAT CGT AAC CTA CCT CTT CTC 3'       | 1488-1472, substitution, 1470-1451               | HYBMTV UTR region               |
| OTR 1263 | S  | SL4-20              | 5' TCA ATA GGG AGC TGC AGT C 3'                             | 1427-1443                                        | HYBMTV UTR region               |
| OTR 1264 | AS |                     | 5' GAC TGC AGC TCC CTA TGA TGA GTC CGT TCC GCT CTT 3'       | 1444-1427, substitution, 1425-1408               | HYBMTV UTR region               |
| OTR 930  | S  | Used for sequencing | 5' GCT TGT GTG TTG GAG GTC GCT GAG 3'                       | 90-113                                           | pcDNA3                          |
| OTR 725  | S  |                     | 5' aaaaa agc ggc cgc CCC TCG GAT AAG TGA CCC TTG TC 3'      | 1325-1347                                        | HYBMTV UTR region               |
| OTR 580  | S  | $\beta$ -actin      | 5' TGA GCT GCG TGT GGC TCC 3'                               | Tan <i>et al.</i> , J. Virol. 1995 69:5607-5620. | Actin Spliced                   |
| OTR 581  | AS | $\beta$ -actin      | 5' GGC ATG GGG GAG GGC ATA CC 3'                            | Tan <i>et al.</i> , J. Virol. 1995 69:5607-5620. | Actin Spliced or unspliced mRNA |

|                       |       |                     |                                             |                                                  |                           |
|-----------------------|-------|---------------------|---------------------------------------------|--------------------------------------------------|---------------------------|
| OTR 582               | S     | $\beta$ -actin      | 5' CCA GTG GCT TCC CCA GTG 3'               | Tan <i>et al.</i> , J. Virol. 1995 69:5607-5620. | Actin S-1. Unspliced mRNA |
| OTR 671               | S     | Vector specific     | 5' GTC CTA ATA TTC ACG TCT CGT GTG 3'       | 1179-1202                                        | HYBMTV R region           |
| OTR 672               | AS    | Vector specific     | 5' CTG TTC GGG CGC CAG CTG CCG CAG 3'       | 1321-1298                                        | HYBMTV PBS region         |
| MTV-1LTR - SITEM1 FAM | Probe | qPCR probe          | 5' TCG CCA TCC CGT CTC C 3'                 | 1214-1229                                        | HYBMTV U5 region          |
| MTV-1LTR -SITEF       | S     | qPCR Forward primer | 5' CGT CTC GTG TGT TTG TGT TTG TGT CTG T 3' | 1192-1213                                        | HYBMTV U5 region          |
| MTV-1LTR -SITER       | AS    | qPCR Reverse Primer | 5' CCT CTG GAA AGT GAA GGA TAA GTG A 3'     | 1259-1235                                        | HYBMTV U5 region          |

Underlined sequence: T7 promoter.

Sequence in lower case: artificial and restriction enzyme sequences that were introduced in the oligos.

\*S, sense; AS, antisense.

\*\*The MMTV nucleotide numbering system refers to the nucleotide positions refer to HYBMTV a molecular clone created by Shackleford and Varmus (62).

\*\*\*Primers used for amplifying wild type and mutant clones encompassing SL4 region with T7 promoter for *in vitro* transcription of RNA for hSHAPE.
