# Supplementary material
Source: publisher figshare collection journal article supplement (https://tandf.figshare.com/articles/dataset/_/6652289)
Supplement: Supplementary file 3 [file 2]

Supplemental Table 2

| DA24 | SL4-06 |        | SL4-10 |        | SL4-11 |        |        |
|------|--------|--------|--------|--------|--------|--------|--------|
|      | Mean V | seqNum | Mean V | seqNum | Mean V | seqNum | Mean V |
| 100  | 0.907  | 100    | 1.310  | 100    | 1.450  | 100    | 1.530  |
| 101  | 0.483  | 101    | 0.697  | 101    | 0.393  | 101    | 0.257  |
| 102  | 0.177  | 102    | 0.110  | 102    | 0.187  | 102    | 0.493  |
| 103  | 0.000  | 103    | 0.000  | 103    | 0.000  | 103    | 0.350  |
| 104  | 0.000  | 104    | 0.000  | 104    | 0.023  | 104    | 0.000  |
| 105  | 0.147  | 105    | 0.157  | 105    | 0.060  | 105    | 0.050  |
| 106  | 0.030  | 106    | 0.150  | 106    | 0.093  | 106    | 0.137  |
| 107  | 0.417  | 107    | 0.477  | 107    | 0.043  | 107    | 0.127  |
| 108  | 0.150  | 108    | 0.293  | 108    | 0.073  | 108    | 0.130  |
| 109  | 0.460  | 109    | 0.470  | 109    | 0.047  | 109    | 0.127  |
| 110  | 0.217  | 110    | 0.453  | 110    | 0.193  | 110    | 0.240  |
| 111  | 0.233  | 111    | 0.267  | 111    | 0.193  | 111    | 0.530  |
| 112  | 0.050  | 112    | 0.000  | 112    | 0.000  | 112    | 0.443  |
| 113  | 1.030  | 113    | 0.883  | 113    | 1.970  | 113    | 2.607  |
| 114  | 0.397  | 114    | 0.370  | 114    | 0.660  | 114    | 0.757  |
| 115  | 1.823  | 115    | 1.937  | 115    | 2.987  | 115    | 3.667  |
| 116  | 1.110  | 116    | 0.353  | 116    | 0.433  | 116    | 0.567  |
| 117  | 0.500  | 117    | 0.193  | 117    | 0.100  | 117    | 0.000  |
| 118  | 0.210  | 118    | 0.040  | 118    | 0.000  | 118    | 0.000  |
| 119  | 0.237  | 119    | 0.367  | 119    | 0.397  | 119    | 0.580  |
| 120  | 0.710  | 120    | 0.617  | 120    | 0.370  | 120    | 1.000  |
| 121  | 0.293  | 121    | 0.423  | 121    | 0.890  | 121    | 0.567  |
| 122  | 0.000  | 122    | 0.537  | 122    | 0.000  | 122    | 0.207  |
| 123  | 0.323  | 123    | 0.503  | 123    | 0.023  | 123    | 0.307  |
| 124  | 0.393  | 124    | 0.440  | 124    | 0.110  | 124    | 0.333  |
| 125  | 0.277  | 125    | 0.440  | 125    | 0.077  | 125    | 0.460  |
| 126  | 0.043  | 126    | 0.053  | 126    | 0.000  | 126    | 0.023  |
| 127  | 0.223  | 127    | 0.347  | 127    | 0.000  | 127    | 0.050  |
| 128  | 0.510  | 128    | 0.210  | 128    | 0.247  | 128    | 0.307  |
| 129  | 0.360  | 129    | 0.243  | 129    | 0.090  | 129    | 0.107  |
| 130  | 0.203  | 130    | 0.000  | 130    | 0.000  | 130    | 0.153  |
| 131  | 0.000  | 131    | 0.000  | 131    | 0.000  | 131    | 0.000  |
| 132  | 0.000  | 132    | 0.000  | 132    | 0.000  | 132    | 0.000  |
| 133  | 0.017  | 133    | 0.000  | 133    | 0.000  | 133    | 0.040  |
| 134  | 0.363  | 134    | 0.370  | 134    | 0.207  | 134    | 0.540  |
| 135  | 0.117  | 135    | 0.213  | 135    | 0.027  | 135    | 0.277  |
| 136  | 0.177  | 136    | 0.340  | 136    | 0.287  | 136    | 0.267  |
| 137  | 0.117  | 137    | 0.027  | 137    | 0.073  | 137    | 0.110  |
| 138  | 0.107  | 138    | 0.000  | 138    | 0.003  | 138    | 0.177  |
| 139  | 0.240  | 139    | 0.513  | 139    | 0.203  | 139    | 0.270  |
| 140  | 0.293  | 140    | 0.113  | 140    | 0.100  | 140    | 0.210  |
| 141  | 0.247  | 141    | 0.240  | 141    | 0.047  | 141    | 0.147  |
| 142  | 0.000  | 142    | 0.000  | 142    | 0.000  | 142    | 0.000  |
| 143  | 0.023  | 143    | 0.000  | 143    | 0.000  | 143    | 0.167  |
| 144  | 0.397  | 144    | 0.320  | 144    | 0.250  | 144    | 0.663  |
| 145  | 0.493  | 145    | 1.253  | 145    | 0.630  | 145    | 1.313  |
| 146  | 0.413  | 146    | 1.017  | 146    | 1.077  | 146    | 1.097  |
| 147  | 0.000  | 147    | 0.000  | 147    | 0.830  | 147    | 0.373  |
| 148  | 0.107  | 148    | 0.673  | 148    | 0.930  | 148    | 0.637  |
| 149  | 0.270  | 149    | 0.397  | 149    | 0.300  | 149    | 0.433  |

|     |       |     |       |     |       |     |       |
|-----|-------|-----|-------|-----|-------|-----|-------|
| 150 | 0.327 | 150 | 0.110 | 150 | 0.073 | 150 | 0.373 |
| 151 | 0.307 | 151 | 0.073 | 151 | 0.047 | 151 | 0.120 |
| 152 | 0.000 | 152 | 0.000 | 152 | 0.000 | 152 | 0.030 |
| 153 | 0.000 | 153 | 0.000 | 153 | 0.000 | 153 | 0.367 |
| 154 | 0.000 | 154 | 0.000 | 154 | 0.000 | 154 | 0.210 |
| 155 | 0.000 | 155 | 0.000 | 155 | 0.000 | 155 | 0.043 |
| 156 | 0.017 | 156 | 0.003 | 156 | 0.000 | 156 | 0.010 |
| 157 | 0.440 | 157 | 0.083 | 157 | 0.310 | 157 | 0.270 |
| 158 | 0.447 | 158 | 0.043 | 158 | 0.017 | 158 | 0.173 |
| 159 | 0.427 | 159 | 0.040 | 159 | 0.007 | 159 | 0.117 |
| 160 | 0.053 | 160 | 0.000 | 160 | 0.000 | 160 | 0.000 |
| 161 | 0.870 | 161 | 0.303 | 161 | 0.833 | 161 | 0.930 |
| 162 | 0.677 | 162 | 0.067 | 162 | 0.130 | 162 | 0.040 |
| 163 | 0.340 | 163 | 0.123 | 163 | 0.117 | 163 | 0.213 |
| 164 | 0.240 | 164 | 0.000 | 164 | 0.070 | 164 | 0.203 |
| 165 | 0.000 | 165 | 0.000 | 165 | 0.003 | 165 | 0.040 |
| 166 | 0.157 | 166 | 0.000 | 166 | 0.090 | 166 | 0.103 |
| 167 | 0.083 | 167 | 0.000 | 167 | 0.097 | 167 | 0.257 |
| 168 | 0.000 | 168 | 0.000 | 168 | 0.000 | 168 | 0.123 |
| 169 | 0.293 | 169 | 0.140 | 169 | 0.247 | 169 | 0.297 |
| 170 | 0.210 | 170 | 0.160 | 170 | 0.077 | 170 | 0.220 |
| 171 | 0.000 | 171 | 0.070 | 171 | 0.000 | 171 | 0.093 |
| 172 | 0.227 | 172 | 0.293 | 172 | 0.267 | 172 | 0.143 |
| 173 | 0.547 | 173 | 0.567 | 173 | 0.397 | 173 | 0.553 |
| 174 | 0.390 | 174 | 0.500 | 174 | 0.440 | 174 | 0.213 |
| 175 | 0.170 | 175 | 0.073 | 175 | 0.153 | 175 | 0.077 |
| 176 | 0.357 | 176 | 0.030 | 176 | 0.027 | 176 | 0.000 |
| 177 | 0.047 | 177 | 0.013 | 177 | 0.000 | 177 | 0.020 |
| 178 | 0.010 | 178 | 0.027 | 178 | 0.067 | 178 | 0.067 |
| 179 | 0.397 | 179 | 0.490 | 179 | 0.277 | 179 | 0.130 |
| 180 | 0.357 | 180 | 0.253 | 180 | 0.230 | 180 | 0.173 |
| 181 | 0.323 | 181 | 0.330 | 181 | 0.267 | 181 | 0.097 |
| 182 | 0.503 | 182 | 0.393 | 182 | 0.237 | 182 | 0.187 |
| 183 | 0.117 | 183 | 0.270 | 183 | 0.137 | 183 | 0.043 |
| 184 | 0.033 | 184 | 0.043 | 184 | 0.010 | 184 | 0.100 |
| 185 | 0.503 | 185 | 0.337 | 185 | 0.220 | 185 | 0.260 |
| 186 | 0.180 | 186 | 0.203 | 186 | 0.090 | 186 | 0.167 |
| 187 | 0.080 | 187 | 0.207 | 187 | 0.257 | 187 | 0.253 |
| 188 | 0.537 | 188 | 0.490 | 188 | 0.630 | 188 | 0.460 |
| 189 | 0.350 | 189 | 0.317 | 189 | 0.260 | 189 | 0.267 |
| 190 | 0.390 | 190 | 0.173 | 190 | 0.293 | 190 | 0.187 |
| 191 | 0.213 | 191 | 0.217 | 191 | 0.213 | 191 | 0.180 |
| 192 | 0.310 | 192 | 0.137 | 192 | 0.237 | 192 | 0.147 |
| 193 | 0.193 | 193 | 0.053 | 193 | 0.167 | 193 | 0.250 |
| 194 | 0.307 | 194 | 0.133 | 194 | 0.283 | 194 | 0.230 |
| 195 | 0.357 | 195 | 0.347 | 195 | 0.387 | 195 | 0.257 |
| 196 | 0.403 | 196 | 0.477 | 196 | 0.377 | 196 | 0.337 |
| 197 | 0.737 | 197 | 0.580 | 197 | 0.560 | 197 | 0.353 |
| 198 | 0.403 | 198 | 0.317 | 198 | 0.243 | 198 | 0.283 |
| 199 | 0.143 | 199 | 0.000 | 199 | 0.093 | 199 | 0.050 |
| 200 | 0.023 | 200 | 0.103 | 200 | 0.057 | 200 | 0.150 |
| 201 | 0.133 | 201 | 0.157 | 201 | 0.000 | 201 | 0.017 |
| 202 | 0.017 | 202 | 0.180 | 202 | 0.017 | 202 | 0.357 |
| 203 | 0.230 | 203 | 0.527 | 203 | 0.183 | 203 | 0.340 |

|     |       |     |       |     |       |     |       |
|-----|-------|-----|-------|-----|-------|-----|-------|
| 204 | 0.183 | 204 | 0.403 | 204 | 0.157 | 204 | 0.187 |
| 205 | 0.047 | 205 | 0.287 | 205 | 0.313 | 205 | 0.400 |
| 206 | 0.093 | 206 | 0.487 | 206 | 0.350 | 206 | 0.250 |
| 207 | 0.187 | 207 | 0.217 | 207 | 0.267 | 207 | 0.213 |
| 208 | 0.360 | 208 | 0.510 | 208 | 0.363 | 208 | 0.150 |
| 209 | 0.387 | 209 | 0.867 | 209 | 0.547 | 209 | 0.453 |
| 210 | 0.420 | 210 | 0.543 | 210 | 0.193 | 210 | 0.183 |
| 211 | 0.000 | 211 | 0.013 | 211 | 0.000 | 211 | 0.000 |
| 212 | 0.000 | 212 | 0.000 | 212 | 0.000 | 212 | 0.020 |
| 213 | 0.000 | 213 | 0.000 | 213 | 0.000 | 213 | 0.000 |
| 214 | 0.000 | 214 | 0.020 | 214 | 0.000 | 214 | 0.027 |
| 215 | 0.223 | 215 | 0.233 | 215 | 0.183 | 215 | 0.197 |
| 216 | 0.487 | 216 | 0.300 | 216 | 0.193 | 216 | 0.157 |
| 217 | 0.180 | 217 | 0.153 | 217 | 0.033 | 217 | 0.027 |
| 218 | 0.050 | 218 | 0.257 | 218 | 0.000 | 218 | 0.087 |
| 219 | 0.327 | 219 | 0.270 | 219 | 0.250 | 219 | 0.107 |
| 220 | 0.323 | 220 | 0.287 | 220 | 0.480 | 220 | 0.227 |
| 221 | 0.313 | 221 | 0.163 | 221 | 0.310 | 221 | 0.140 |
| 222 | 0.080 | 222 | 0.233 | 222 | 0.077 | 222 | 0.027 |
| 223 | 0.277 | 223 | 0.213 | 223 | 0.220 | 223 | 0.183 |
| 224 | 0.263 | 224 | 0.550 | 224 | 0.350 | 224 | 0.193 |
| 225 | 0.000 | 225 | 0.083 | 225 | 0.027 | 225 | 0.000 |
| 226 | 0.000 | 226 | 0.033 | 226 | 0.000 | 226 | 0.000 |
| 227 | 0.050 | 227 | 0.180 | 227 | 0.250 | 227 | 0.397 |
| 228 | 0.773 | 228 | 0.587 | 228 | 0.730 | 228 | 0.820 |
| 229 | 0.630 | 229 | 0.680 | 229 | 0.640 | 229 | 0.467 |
| 230 | 0.000 | 230 | 0.000 | 230 | 0.487 | 230 | 0.190 |
| 231 | 0.140 | 231 | 0.193 | 231 | 0.127 | 231 | 0.020 |
| 232 | 0.187 | 232 | 0.320 | 232 | 0.487 | 232 | 0.087 |
| 233 | 0.000 | 233 | 0.000 | 233 | 0.627 | 233 | 0.087 |
| 234 | 0.173 | 234 | 0.033 | 234 | 0.013 | 234 | 0.083 |
| 235 | 0.000 | 235 | 0.000 | 235 | 0.910 | 235 | 0.147 |
| 236 | 0.347 | 236 | 0.337 | 236 | 0.953 | 236 | 0.830 |
| 237 | 0.803 | 237 | 0.980 | 237 | 1.477 | 237 | 1.497 |
| 238 | 0.177 | 238 | 0.000 | 238 | 0.390 | 238 | 0.507 |
| 239 | 0.197 | 239 | 0.043 | 239 | 0.370 | 239 | 0.330 |
| 240 | 0.327 | 240 | 0.030 | 240 | 0.307 | 240 | 0.173 |
| 241 | 0.100 | 241 | 0.050 | 241 | 0.180 | 241 | 0.127 |
| 242 | 0.220 | 242 | 0.000 | 242 | 0.357 | 242 | 0.307 |
| 243 | 0.090 | 243 | 0.047 | 243 | 0.000 | 243 | 0.163 |
| 244 | 0.000 | 244 | 0.043 | 244 | 0.000 | 244 | 0.000 |
| 245 | 0.227 | 245 | 0.143 | 245 | 0.080 | 245 | 0.060 |
| 246 | 0.083 | 246 | 0.000 | 246 | 0.020 | 246 | 0.087 |
| 247 | 0.000 | 247 | 0.000 | 247 | 0.000 | 247 | 0.063 |
| 248 | 0.000 | 248 | 0.000 | 248 | 0.000 | 248 | 0.020 |
| 249 | 1.547 | 249 | 0.027 | 249 | 1.883 | 249 | 2.280 |
| 250 | 0.133 | 250 | 0.000 | 250 | 0.073 | 250 | 0.133 |
| 251 | 0.087 | 251 | 0.017 | 251 | 0.000 | 251 | 0.050 |
| 252 | 0.000 | 252 | 0.310 | 252 | 0.000 | 252 | 0.103 |
| 253 | 0.173 | 253 | 1.683 | 253 | 0.000 | 253 | 0.120 |
| 254 | 0.113 | 254 | 0.097 | 254 | 0.107 | 254 | 0.153 |
| 255 | 0.000 | 255 | 0.000 | 255 | 0.113 | 255 | 0.273 |
| 256 | 0.000 | 256 | 0.000 | 256 | 0.040 | 256 | 0.000 |
| 257 | 0.557 | 257 | 0.277 | 257 | 0.000 | 257 | 0.417 |

|     |       |     |       |     |       |     |       |
|-----|-------|-----|-------|-----|-------|-----|-------|
| 258 | 0.833 | 258 | 1.190 | 258 | 0.050 | 258 | 1.270 |
| 259 | 0.110 | 259 | 0.280 | 259 | 0.527 | 259 | 0.060 |
| 260 | 0.227 | 260 | 0.653 | 260 | 0.290 | 260 | 0.107 |
| 261 | 0.000 | 261 | 0.027 | 261 | 0.133 | 261 | 0.000 |
| 262 | 0.210 | 262 | 0.350 | 262 | 0.493 | 262 | 0.233 |
| 263 | 0.247 | 263 | 0.150 | 263 | 0.807 | 263 | 0.220 |
| 264 | 0.243 | 264 | 0.327 | 264 | 0.697 | 264 | 0.087 |
| 265 | 0.383 | 265 | 0.270 | 265 | 0.527 | 265 | 0.517 |
| 266 | 0.640 | 266 | 0.323 | 266 | 0.817 | 266 | 0.607 |
| 267 | 0.000 | 267 | 0.000 | 267 | 0.273 | 267 | 0.347 |
| 268 | 0.087 | 268 | 0.333 | 268 | 0.090 | 268 | 0.643 |
| 269 | 0.520 | 269 | 0.423 | 269 | 0.000 | 269 | 0.673 |
| 270 | 0.220 | 270 | 0.350 | 270 | 0.003 | 270 | 0.137 |
| 271 | 0.137 | 271 | 0.113 | 271 | 0.013 | 271 | 0.090 |
| 272 | 0.000 | 272 | 0.000 | 272 | 0.137 | 272 | 0.000 |
| 273 | 0.033 | 273 | 0.000 | 273 | 0.037 | 273 | 0.000 |
| 274 | 0.243 | 274 | 0.180 | 274 | 0.073 | 274 | 0.177 |
| 275 | 0.243 | 275 | 0.230 | 275 | 0.237 | 275 | 0.120 |
| 276 | 0.297 | 276 | 0.150 | 276 | 0.260 | 276 | 0.257 |
| 277 | 0.220 | 277 | 0.087 | 277 | 0.563 | 277 | 0.053 |
| 278 | 0.103 | 278 | 0.290 | 278 | 2.087 | 278 | 0.110 |
| 279 | 0.070 | 279 | 0.230 | 279 | 3.043 | 279 | 0.250 |
| 280 | 0.330 | 280 | 0.260 | 280 | 1.007 | 280 | 0.470 |
| 281 | 1.990 | 281 | 1.090 | 281 | 2.307 | 281 | 2.030 |
| 282 | 2.963 | 282 | 1.633 | 282 | 1.973 | 282 | 2.980 |
| 283 | 1.323 | 283 | 0.730 | 283 | 1.767 | 283 | 1.170 |
| 284 | 2.843 | 284 | 1.540 | 284 | 3.100 | 284 | 2.527 |
| 285 | 2.130 | 285 | 1.347 | 285 | 1.243 | 285 | 1.987 |
| 286 | 2.230 | 286 | 1.097 | 286 | 0.017 | 286 | 1.663 |
| 287 | 3.707 | 287 | 1.480 | 287 | 0.000 | 287 | 2.997 |
| 288 | 1.780 | 288 | 1.077 | 288 | 0.160 | 288 | 1.260 |
| 289 | 0.073 | 289 | 0.020 | 289 | 0.210 | 289 | 0.017 |
| 290 | 0.000 | 290 | 0.000 | 290 | 0.163 | 290 | 0.000 |
| 291 | 0.143 | 291 | 0.070 | 291 | 0.650 | 291 | 0.013 |
| 292 | 0.243 | 292 | 0.000 | 292 | 1.533 | 292 | 0.363 |
| 293 | 0.033 | 293 | 0.000 | 293 | 1.100 | 293 | 0.217 |
| 294 | 0.550 | 294 | 0.033 | 294 | 1.073 | 294 | 0.623 |
| 295 | 0.843 | 295 | 1.080 | 295 | 0.083 | 295 | 1.137 |
| 296 | 1.553 | 296 | 0.637 | 296 | 0.067 | 296 | 1.440 |
| 297 | 1.493 | 297 | 0.237 | 297 | 0.027 | 297 | 0.870 |
| 298 | 0.283 | 298 | 0.017 | 298 | 0.037 | 298 | 0.080 |
| 299 | 0.137 | 299 | 0.000 | 299 | 0.043 | 299 | 0.090 |
| 300 | 0.060 | 300 | 0.143 | 300 | 0.000 | 300 | 0.013 |
| 301 | 0.107 | 301 | 0.000 | 301 | 0.030 | 301 | 0.053 |
| 302 | 0.180 | 302 | 0.737 | 302 | 0.383 | 302 | 0.003 |
| 303 | 0.000 | 303 | 0.847 | 303 | 0.090 | 303 | 0.043 |
| 304 | 0.230 | 304 | 1.117 | 304 | 0.940 | 304 | 0.033 |
| 305 | 0.000 | 305 | 0.837 | 305 | 1.420 | 305 | 0.073 |
| 306 | 0.513 | 306 | 0.310 | 306 | 0.913 | 306 | 0.240 |
| 307 | 1.537 | 307 | 0.067 | 307 | 0.670 | 307 | 0.943 |
| 308 | 2.070 | 308 | 0.123 | 308 | 0.337 | 308 | 1.477 |
| 309 | 1.620 | 309 | 0.407 | 309 | 0.077 | 309 | 0.950 |
| 310 | 1.297 | 310 | 0.700 | 310 | 0.000 | 310 | 0.610 |
| 311 | 0.743 | 311 | 0.557 | 311 | 0.260 | 311 | 0.333 |

|     |       |     |       |     |       |     |       |
|-----|-------|-----|-------|-----|-------|-----|-------|
| 312 | 0.437 | 312 | 0.000 | 312 | 0.127 | 312 | 0.050 |
| 313 | 0.003 | 313 | 0.160 | 313 | 0.083 | 313 | 0.007 |
| 314 | 0.583 | 314 | 0.353 | 314 | 0.050 | 314 | 0.283 |
| 315 | 0.380 | 315 | 0.127 | 315 | 0.047 | 315 | 0.073 |
| 316 | 0.283 | 316 | 0.023 | 316 | 0.353 | 316 | 0.007 |
| 317 | 0.230 | 317 | 0.000 | 317 | 0.560 | 317 | 0.040 |
| 318 | 0.317 | 318 | 0.003 | 318 | 0.013 | 318 | 0.053 |
| 319 | 0.580 | 319 | 0.097 | 319 | 0.107 | 319 | 0.687 |
| 320 | 0.807 | 320 | 0.063 | 320 | 0.100 | 320 | 0.700 |
| 321 | 0.093 | 321 | 0.020 | 321 | 0.260 | 321 | 0.023 |
| 322 | 0.250 | 322 | 0.470 | 322 | 0.320 | 322 | 0.083 |
| 323 | 0.143 | 323 | 0.003 | 323 | 0.013 | 323 | 0.037 |
| 324 | 0.213 | 324 | 0.117 | 324 | 0.000 | 324 | 0.200 |
| 325 | 0.410 | 325 | 0.300 | 325 | 0.103 | 325 | 0.170 |
| 326 | 0.047 | 326 | 0.000 | 326 | 1.693 | 326 | 0.000 |
| 327 | 0.000 | 327 | 0.000 | 327 | 0.617 | 327 | 0.000 |
| 328 | 0.107 | 328 | 0.173 | 328 | 1.470 | 328 | 0.117 |
| 329 | 0.567 | 329 | 0.000 | 329 | 1.153 | 329 | 0.880 |
| 330 | 0.943 | 330 | 0.793 | 330 | 1.023 | 330 | 1.080 |
| 331 | 1.827 | 331 | 1.443 | 331 | 0.253 | 331 | 1.583 |
| 332 | 1.527 | 332 | 1.260 | 332 | 0.037 | 332 | 1.337 |
| 333 | 1.457 | 333 | 1.140 | 333 | 0.000 | 333 | 1.080 |
| 334 | 0.450 | 334 | 0.363 | 334 | 0.387 | 334 | 0.337 |
| 335 | 0.070 | 335 | 0.020 | 335 | 0.000 | 335 | 0.103 |
| 336 | 0.083 | 336 | 0.103 | 336 | 0.077 | 336 | 0.083 |
| 337 | 0.530 | 337 | 0.350 | 337 | 0.000 | 337 | 0.373 |
| 338 | 0.013 | 338 | 0.000 | 338 | 0.283 | 338 | 0.000 |
| 339 | 0.107 | 339 | 0.000 | 339 | 0.130 | 339 | 0.017 |
| 340 | 0.023 | 340 | 0.000 | 340 | 0.000 | 340 | 0.000 |
| 341 | 0.333 | 341 | 0.087 | 341 | 0.977 | 341 | 0.117 |
| 342 | 0.123 | 342 | 0.010 | 342 | 0.113 | 342 | 0.093 |
| 343 | 0.113 | 343 | 0.000 | 343 | 0.553 | 343 | 0.130 |
| 344 | 1.240 | 344 | 1.217 | 344 | 0.490 | 344 | 0.990 |
| 345 | 0.133 | 345 | 0.473 | 345 | 0.630 | 345 | 0.223 |
| 346 | 0.677 | 346 | 1.217 | 346 | 0.000 | 346 | 0.727 |
| 347 | 0.790 | 347 | 1.120 | 347 | 0.000 | 347 | 0.693 |
| 348 | 1.047 | 348 | 1.157 | 348 | 0.407 | 348 | 0.850 |
| 349 | 0.000 | 349 | 0.000 | 349 | 0.000 | 349 | 0.000 |
| 350 | 0.020 | 350 | 0.023 | 350 | 0.000 | 350 | 0.023 |
| 351 | 0.500 | 351 | 0.277 | 351 | 0.267 | 351 | 0.460 |
| 352 | 0.140 | 352 | 0.000 | 352 | 3.357 | 352 | 0.000 |
| 353 | 0.000 | 353 | 0.000 | 353 | 0.143 | 353 | 0.000 |
| 354 | 0.483 | 354 | 0.043 | 354 | 0.070 | 354 | 0.473 |
| 355 | 3.923 | 355 | 2.870 | 355 | 0.210 | 355 | 3.373 |
| 356 | 0.293 | 356 | 0.137 | 356 | 0.247 | 356 | 0.297 |
| 357 | 0.150 | 357 | 0.360 | 357 | 0.677 | 357 | 0.247 |
| 358 | 0.410 | 358 | 0.420 | 358 | 1.690 | 358 | 0.460 |
| 359 | 0.363 | 359 | 0.500 | 359 | 0.230 | 359 | 0.533 |
| 360 | 0.870 | 360 | 0.780 | 360 | 0.103 | 360 | 0.790 |
| 361 | 0.000 | 361 | 0.080 | 361 | 0.080 | 361 | 0.707 |
| 362 | 0.150 | 362 | 0.327 | 362 | 0.030 | 362 | 0.110 |
| 363 | 0.100 | 363 | 0.127 | 363 | 0.000 | 363 | 0.083 |
| 364 | 0.093 | 364 | 0.043 | 364 | 0.000 | 364 | 0.033 |
| 365 | 0.000 | 365 | 0.000 | 365 | 0.000 | 365 | 0.027 |

|     |       |     |       |     |       |     |       |
|-----|-------|-----|-------|-----|-------|-----|-------|
| 366 | 0.017 | 366 | 0.060 | 366 | 0.037 | 366 | 0.003 |
| 367 | 0.173 | 367 | 0.023 | 367 | 0.000 | 367 | 0.073 |
| 368 | 0.067 | 368 | 0.010 | 368 | 0.013 | 368 | 0.000 |
| 369 | 0.170 | 369 | 0.063 | 369 | 0.093 | 369 | 0.000 |
| 370 | 0.000 | 370 | 0.000 | 370 | 0.710 | 370 | 0.000 |
| 371 | 0.013 | 371 | 0.000 | 371 | 1.637 | 371 | 0.073 |
| 372 | 0.160 | 372 | 0.080 | 372 | 3.440 | 372 | 0.133 |
| 373 | 0.857 | 373 | 0.333 | 373 | 2.333 | 373 | 0.937 |
| 374 | 2.013 | 374 | 1.133 | 374 | 2.477 | 374 | 2.143 |
| 375 | 3.873 | 375 | 3.587 | 375 | 0.070 | 375 | 4.007 |
| 376 | 2.443 | 376 | 2.413 | 376 | 0.017 | 376 | 2.503 |
| 377 | 2.737 | 377 | 2.777 | 377 | 0.007 | 377 | 2.410 |
| 378 | 0.063 | 378 | 0.003 | 378 | 0.000 | 378 | 0.017 |
| 379 | 0.110 | 379 | 0.010 | 379 | 0.000 | 379 | 0.037 |
| 380 | 0.000 | 380 | 0.000 | 380 | 0.000 | 380 | 0.027 |
| 381 | 0.000 | 381 | 0.000 | 381 | 0.030 | 381 | 0.000 |
| 382 | 0.000 | 382 | 0.000 | 382 | 0.000 | 382 | 0.000 |
| 383 | 0.000 | 383 | 0.000 | 383 | 0.000 | 383 | 0.000 |
| 384 | 0.000 | 384 | 0.000 | 384 | 0.947 | 384 | 0.000 |
| 385 | 0.000 | 385 | 0.000 | 385 | 1.573 | 385 | 0.000 |
| 386 | 0.040 | 386 | 0.000 | 386 | 0.273 | 386 | 0.033 |
| 387 | 0.970 | 387 | 0.933 | 387 | 0.203 | 387 | 0.890 |
| 388 | 0.060 | 388 | 0.237 | 388 | 0.027 | 388 | 0.893 |
| 389 | 0.303 | 389 | 1.623 | 389 | 0.000 | 389 | 0.553 |
| 390 | 0.060 | 390 | 0.287 | 390 | 0.000 | 390 | 0.253 |
| 391 | 0.007 | 391 | 0.083 | 391 | 0.000 | 391 | 0.037 |
| 392 | 0.000 | 392 | 0.060 | 392 | 0.020 | 392 | 0.000 |
| 393 | 0.007 | 393 | 0.037 | 393 | 0.310 | 393 | 0.083 |
| 394 | 0.000 | 394 | 0.027 | 394 | 0.687 | 394 | 0.000 |
| 395 | 0.037 | 395 | 0.207 | 395 | 0.193 | 395 | 0.027 |
| 396 | 0.350 | 396 | 0.587 | 396 | 0.203 | 396 | 0.327 |
| 397 | 0.653 | 397 | 0.687 | 397 | 0.227 | 397 | 0.647 |
| 398 | 0.163 | 398 | 0.207 | 398 | 0.030 | 398 | 0.217 |
| 399 | 0.163 | 399 | 0.070 | 399 | 0.000 | 399 | 0.263 |
| 400 | 0.270 | 400 | 0.193 | 400 | 0.423 | 400 | 0.230 |
| 401 | 0.030 | 401 | 0.227 | 401 | 0.133 | 401 | 0.057 |
| 402 | 0.000 | 402 | 0.330 | 402 | 0.000 | 402 | 0.053 |
| 403 | 0.357 | 403 | 0.483 | 403 | 1.000 | 403 | 0.473 |
| 404 | 0.190 | 404 | 0.497 | 404 | 0.603 | 404 | 0.300 |
| 405 | 0.103 | 405 | 0.480 | 405 | 0.000 | 405 | 0.070 |
| 406 | 1.090 | 406 | 1.107 | 406 | 0.580 | 406 | 0.967 |
| 407 | 0.000 | 407 | 0.000 | 407 | 0.777 | 407 | 0.550 |
| 408 | 0.110 | 408 | 0.297 | 408 | 0.643 | 408 | 0.040 |
| 409 | 0.547 | 409 | 0.750 | 409 | 0.447 | 409 | 0.670 |
| 410 | 0.743 | 410 | 0.663 | 410 | 0.643 | 410 | 0.857 |
| 411 | 0.547 | 411 | 0.670 | 411 | 0.813 | 411 | 0.757 |
| 412 | 0.243 | 412 | 0.390 | 412 | 0.670 | 412 | 0.527 |
| 413 | 0.543 | 413 | 0.597 | 413 | 0.740 | 413 | 0.630 |
| 414 | 0.707 | 414 | 0.773 | 414 | 0.847 | 414 | 0.760 |
| 415 | 0.593 | 415 | 0.653 | 415 | 0.677 | 415 | 0.570 |
| 416 | 0.640 | 416 | 0.857 | 416 | 0.787 | 416 | 0.703 |
| 417 | 0.757 | 417 | 0.887 | 417 | 0.493 | 417 | 0.810 |
| 418 | 0.637 | 418 | 0.697 | 418 | 1.333 | 418 | 0.663 |
| 419 | 0.743 | 419 | 0.807 | 419 | 0.360 | 419 | 0.663 |

|     |       |     |       |     |       |     |       |
|-----|-------|-----|-------|-----|-------|-----|-------|
| 420 | 0.520 | 420 | 0.490 | 420 | 0.367 | 420 | 0.410 |
| 421 | 0.037 | 421 | 0.030 | 421 | 0.377 | 421 | 0.553 |
| 422 | 0.177 | 422 | 0.510 | 422 | 0.410 | 422 | 0.353 |
| 423 | 0.187 | 423 | 0.617 | 423 | 0.277 | 423 | 0.353 |
| 424 | 0.243 | 424 | 0.343 | 424 | 0.000 | 424 | 0.297 |
| 425 | 0.277 | 425 | 0.423 | 425 | 0.010 | 425 | 0.310 |
| 426 | 0.110 | 426 | 0.223 | 426 | 0.257 | 426 | 0.153 |
| 427 | 0.000 | 427 | 0.000 | 427 | 0.433 | 427 | 0.000 |
| 428 | 0.000 | 428 | 0.023 | 428 | 0.830 | 428 | 0.193 |
| 429 | 0.237 | 429 | 0.260 | 429 | 0.677 | 429 | 0.257 |
| 430 | 0.527 | 430 | 0.677 | 430 | 0.710 | 430 | 0.477 |
| 431 | 0.780 | 431 | 0.677 | 431 | 0.827 | 431 | 0.857 |
| 432 | 0.703 | 432 | 0.810 | 432 | 0.410 | 432 | 0.767 |
| 433 | 0.787 | 433 | 0.703 | 433 | 0.177 | 433 | 0.767 |
| 434 | 0.953 | 434 | 0.650 | 434 | 0.073 | 434 | 0.920 |
| 435 | 0.457 | 435 | 0.140 | 435 | 0.247 | 435 | 0.460 |
| 436 | 0.140 | 436 | 0.173 | 436 | 0.197 | 436 | 0.233 |
| 437 | 0.090 | 437 | 0.160 | 437 | 0.000 | 437 | 0.173 |
| 438 | 0.277 | 438 | 0.223 | 438 | 0.000 | 438 | 0.277 |
| 439 | 0.307 | 439 | 0.230 | 439 | 0.000 | 439 | 0.270 |
| 440 | 0.000 | 440 | 0.027 | 440 | 0.000 | 440 | 0.000 |
| 441 | 0.000 | 441 | 0.103 | 441 | 0.000 | 441 | 0.003 |
| 442 | 0.000 | 442 | 0.000 | 442 | 0.770 | 442 | 0.010 |
| 443 | 0.000 | 443 | 0.000 | 443 | 1.087 | 443 | 0.000 |
| 444 | 0.000 | 444 | 0.003 | 444 | 1.710 | 444 | 0.000 |
| 445 | 0.793 | 445 | 0.800 | 445 | 1.223 | 445 | 0.777 |
| 446 | 1.040 | 446 | 0.747 | 446 | 1.487 | 446 | 1.023 |
| 447 | 1.483 | 447 | 1.330 | 447 | 0.657 | 447 | 1.610 |
| 448 | 0.910 | 448 | 0.910 | 448 | 0.050 | 448 | 1.063 |
| 449 | 1.243 | 449 | 1.317 | 449 | 0.000 | 449 | 1.413 |
| 450 | 0.513 | 450 | 0.750 | 450 | 0.233 | 450 | 0.610 |
| 451 | 0.000 | 451 | 0.033 | 451 | 0.623 | 451 | 0.000 |
| 452 | 0.000 | 452 | 0.027 | 452 | 0.867 | 452 | 0.000 |
| 453 | 0.050 | 453 | 0.180 | 453 | 0.797 | 453 | 0.177 |
| 454 | 0.493 | 454 | 0.503 | 454 | 0.277 | 454 | 0.590 |
| 455 | 0.613 | 455 | 0.960 | 455 | 0.000 | 455 | 0.710 |
| 456 | 0.627 | 456 | 0.913 | 456 | 0.027 | 456 | 0.723 |
| 457 | 0.133 | 457 | 0.780 | 457 | 0.100 | 457 | 0.333 |
| 458 | 0.000 | 458 | 0.040 | 458 | 0.000 | 458 | 0.000 |
| 459 | 0.043 | 459 | 0.100 | 459 | 0.000 | 459 | 0.077 |
| 460 | 0.057 | 460 | 0.043 | 460 | 0.000 | 460 | 0.047 |
| 461 | 0.013 | 461 | 0.017 | 461 | 0.000 | 461 | 0.010 |
| 462 | 0.000 | 462 | 0.000 | 462 | 0.013 | 462 | 0.000 |
| 463 | 0.000 | 463 | 0.000 | 463 | 0.363 | 463 | 0.000 |
| 464 | 0.000 | 464 | 0.000 | 464 | 1.150 | 464 | 0.000 |
| 465 | 0.050 | 465 | 0.357 | 465 | 0.603 | 465 | 0.167 |
| 466 | 0.163 | 466 | 0.663 | 466 | 0.927 | 466 | 0.367 |
| 467 | 0.697 | 467 | 1.110 | 467 | 1.163 | 467 | 1.090 |
| 468 | 0.337 | 468 | 1.127 | 468 | 0.630 | 468 | 0.670 |
| 469 | 0.803 | 469 | 0.907 | 469 | 0.797 | 469 | 0.973 |
| 470 | 1.130 | 470 | 1.080 | 470 | 1.057 | 470 | 1.210 |
| 471 | 0.590 | 471 | 0.610 | 471 | 0.847 | 471 | 0.700 |
| 472 | 0.717 | 472 | 0.737 | 472 | 0.730 | 472 | 0.850 |
| 473 | 0.810 | 473 | 0.860 | 473 | 0.000 | 473 | 1.097 |

|     |       |     |       |     |       |     |       |
|-----|-------|-----|-------|-----|-------|-----|-------|
| 474 | 0.480 | 474 | 0.590 | 474 | 0.683 | 474 | 0.653 |
| 475 | 0.000 | 475 | 0.000 | 475 | 0.000 | 475 | 0.333 |
| 476 | 0.000 | 476 | 0.010 | 476 | 0.000 | 476 | 0.000 |
| 477 | 0.460 | 477 | 0.797 | 477 | 0.083 | 477 | 0.670 |
| 478 | 0.040 | 478 | 0.123 | 478 | 0.627 | 478 | 0.090 |
| 479 | 0.000 | 479 | 0.000 | 479 | 0.780 | 479 | 0.000 |
| 480 | 0.017 | 480 | 0.247 | 480 | 0.687 | 480 | 0.037 |
| 481 | 0.667 | 481 | 0.683 | 481 | 0.263 | 481 | 0.577 |
| 482 | 0.807 | 482 | 0.563 | 482 | 0.000 | 482 | 0.690 |
| 483 | 0.693 | 483 | 0.653 | 483 | 0.097 | 483 | 0.577 |
| 484 | 0.133 | 484 | 0.707 | 484 | 0.297 | 484 | 0.107 |
| 485 | 0.000 | 485 | 0.107 | 485 | 0.577 | 485 | 0.000 |
| 486 | 0.000 | 486 | 0.190 | 486 | 0.000 | 486 | 0.070 |
| 487 | 0.303 | 487 | 0.317 | 487 | 0.000 | 487 | 0.277 |
| 488 | 0.587 | 488 | 0.480 | 488 | 0.000 | 488 | 0.527 |
| 489 | 0.000 | 489 | 0.000 | 489 | 0.077 | 489 | 0.000 |
| 490 | 0.000 | 490 | 0.000 | 490 | 0.157 | 490 | 0.000 |
| 491 | 0.000 | 491 | 0.000 | 491 | 0.000 | 491 | 0.003 |
| 492 | 0.027 | 492 | 0.133 | 492 | 0.000 | 492 | 0.063 |
| 493 | 0.040 | 493 | 0.007 | 493 | 0.007 | 493 | 0.100 |
| 494 | 0.000 | 494 | 0.000 | 494 | 0.637 | 494 | 0.000 |
| 495 | 0.000 | 495 | 0.000 | 495 | 0.000 | 495 | 0.000 |
| 496 | 0.000 | 496 | 0.037 | 496 | 0.000 | 496 | 0.013 |
| 497 | 0.367 | 497 | 0.387 | 497 | 0.177 | 497 | 0.587 |
| 498 | 0.000 | 498 | 0.063 | 498 | 0.260 | 498 | 0.000 |
| 499 | 0.000 | 499 | 0.000 | 499 | 0.357 | 499 | 0.000 |
| 500 | 0.030 | 500 | 0.327 | 500 | 0.443 | 500 | 0.243 |
| 501 | 0.107 | 501 | 0.293 | 501 | 0.893 | 501 | 0.230 |
| 502 | 0.063 | 502 | 0.320 | 502 | 0.093 | 502 | 0.260 |
| 503 | 0.167 | 503 | 0.043 | 503 | 0.713 | 503 | 0.330 |
| 504 | 0.787 | 504 | 0.493 | 504 | 0.000 | 504 | 0.780 |
| 505 | 0.000 | 505 | 0.337 | 505 | 0.000 | 505 | 0.100 |
| 506 | 0.643 | 506 | 0.543 | 506 | 0.013 | 506 | 0.573 |
| 507 | 0.000 | 507 | 0.083 | 507 | 0.050 | 507 | 0.000 |
| 508 | 0.000 | 508 | 0.000 | 508 | 0.000 | 508 | 0.000 |
| 509 | 0.000 | 509 | 0.000 | 509 | 0.323 | 509 | 0.020 |
| 510 | 0.000 | 510 | 0.000 | 510 | 0.033 | 510 | 0.010 |
| 511 | 0.000 | 511 | 0.007 | 511 | 0.000 | 511 | 0.000 |
| 512 | 0.287 | 512 | 0.177 | 512 | 0.000 | 512 | 0.253 |
| 513 | 0.007 | 513 | 0.017 | 513 | 0.000 | 513 | 0.000 |
| 514 | 0.000 | 514 | 0.000 | 514 | 0.090 | 514 | 0.000 |
| 515 | 0.000 | 515 | 0.000 | 515 | 0.007 | 515 | 0.000 |
| 516 | 0.000 | 516 | 0.000 | 516 | 0.133 | 516 | 0.000 |
| 517 | 0.067 | 517 | 0.097 | 517 | 0.300 | 517 | 0.047 |
| 518 | 0.000 | 518 | 0.000 | 518 | 0.177 | 518 | 0.000 |
| 519 | 0.007 | 519 | 0.097 | 519 | 0.493 | 519 | 0.133 |
| 520 | 0.080 | 520 | 0.737 | 520 | 0.060 | 520 | 0.240 |
| 521 | 0.003 | 521 | 0.387 | 521 | 0.347 | 521 | 0.113 |
| 522 | 0.167 | 522 | 0.373 | 522 | 0.383 | 522 | 0.177 |
| 523 | 0.000 | 523 | 0.000 | 523 | 0.053 | 523 | 0.000 |
| 524 | 0.087 | 524 | 0.123 | 524 | 0.000 | 524 | 0.270 |
| 525 | 0.340 | 525 | 0.333 | 525 | 0.000 | 525 | 0.320 |
| 526 | 0.000 | 526 | 0.000 | 526 | 0.170 | 526 | 0.030 |
| 527 | 0.000 | 527 | 0.000 | 527 | 0.387 | 527 | 0.000 |



|     |       |     |       |     |       |     |       |
|-----|-------|-----|-------|-----|-------|-----|-------|
| 528 | 0.000 | 528 | 0.000 | 528 | 0.593 | 528 | 0.000 |
| 529 | 0.017 | 529 | 0.137 | 529 | 0.103 | 529 | 0.107 |
| 530 | 0.000 | 530 | 0.000 | 530 | 0.243 | 530 | 0.063 |
| 531 | 0.310 | 531 | 0.200 | 531 | 0.457 | 531 | 0.583 |
| 532 | 0.027 | 532 | 0.110 | 532 | 0.220 | 532 | 0.127 |
| 533 | 0.097 | 533 | 0.373 | 533 | 0.050 | 533 | 0.187 |
| 534 | 0.420 | 534 | 0.507 | 534 | 0.367 | 534 | 0.403 |
| 535 | 0.177 | 535 | 0.167 | 535 | 0.543 | 535 | 0.113 |
| 536 | 0.000 | 536 | 0.057 | 536 | 0.530 | 536 | 0.000 |
| 537 | 0.063 | 537 | 0.007 | 537 | 0.340 | 537 | 0.097 |
| 538 | 0.320 | 538 | 0.480 | 538 | 0.030 | 538 | 0.763 |
| 539 | 0.480 | 539 | 0.467 | 539 | 0.117 | 539 | 0.490 |
| 540 | 0.293 | 540 | 0.247 | 540 | 0.240 | 540 | 0.170 |
| 541 | 0.027 | 541 | 0.007 | 541 | 0.593 | 541 | 0.000 |
| 542 | 0.000 | 542 | 0.007 | 542 | 0.610 | 542 | 0.030 |
| 543 | 0.193 | 543 | 0.413 | 543 | 0.617 | 543 | 0.383 |
| 544 | 0.650 | 544 | 0.783 | 544 | 0.983 | 544 | 0.557 |
| 545 | 0.617 | 545 | 0.817 | 545 | 0.943 | 545 | 0.537 |
| 546 | 0.530 | 546 | 0.893 | 546 | 0.000 | 546 | 0.610 |
| 547 | 0.383 | 547 | 0.457 | 547 | 0.000 | 547 | 0.580 |
| 548 | 0.873 | 548 | 1.377 | 548 | 0.013 | 548 | 1.177 |
| 549 | 0.000 | 549 | 0.050 | 549 | 0.243 | 549 | 0.053 |
| 550 | 0.000 | 550 | 0.017 | 550 | 0.420 | 550 | 0.000 |
| 551 | 0.163 | 551 | 0.000 | 551 | 0.370 | 551 | 0.033 |
| 552 | 0.363 | 552 | 0.190 | 552 | 0.007 | 552 | 0.177 |
| 553 | 0.293 | 553 | 0.680 | 553 | 0.000 | 553 | 0.363 |
| 554 | 0.200 | 554 | 0.627 | 554 | 0.110 | 554 | 0.337 |
| 555 | 0.000 | 555 | 0.023 | 555 | 0.340 | 555 | 0.013 |
| 556 | 0.000 | 556 | 0.000 | 556 | 0.353 | 556 | 0.000 |
| 557 | 0.000 | 557 | 0.000 | 557 | 0.237 | 557 | 0.183 |
| 558 | 0.050 | 558 | 0.000 | 558 | 0.447 | 558 | 0.037 |
| 559 | 0.043 | 559 | 0.563 | 559 | 0.760 | 559 | 0.133 |
| 560 | 0.077 | 560 | 0.230 | 560 | 0.640 | 560 | 0.067 |
| 561 | 0.317 | 561 | 0.520 | 561 | 0.303 | 561 | 0.210 |
| 562 | 0.607 | 562 | 0.860 | 562 | 0.000 | 562 | 0.483 |
| 563 | 0.567 | 563 | 1.413 | 563 | 0.000 | 563 | 0.553 |
| 564 | 0.113 | 564 | 0.263 | 564 | 0.483 | 564 | 0.227 |
| 565 | 0.000 | 565 | 0.033 | 565 | 1.410 | 565 | 0.000 |
| 566 | 0.000 | 566 | 0.000 | 566 | 0.370 | 566 | 0.000 |
| 567 | 0.360 | 567 | 0.323 |     |       | 567 | 0.387 |
| 568 | 0.000 | 568 | 0.000 |     |       | 568 | 0.000 |
|     |       | 569 | 0.050 |     |       | 569 | 0.063 |

| SL4-13 |        | SL4-14 |        | SL4-15 |        | SL4-16 |        |
|--------|--------|--------|--------|--------|--------|--------|--------|
| seqNum | Mean V |
| 100    | 1.287  | 100    | 1.220  | 100    | 1.287  | 100    | 1.053  |
| 101    | 0.392  | 101    | 0.430  | 101    | 0.503  | 101    | 0.230  |
| 102    | 0.272  | 102    | 0.057  | 102    | 0.147  | 102    | 0.117  |
| 103    | 0.183  | 103    | 0.000  | 103    | 0.013  | 103    | 0.000  |
| 104    | 0.057  | 104    | 0.000  | 104    | 0.130  | 104    | 0.067  |
| 105    | 0.027  | 105    | 0.220  | 105    | 0.130  | 105    | 0.087  |
| 106    | 0.028  | 106    | 0.017  | 106    | 0.227  | 106    | 0.017  |
| 107    | 0.220  | 107    | 0.060  | 107    | 0.170  | 107    | 0.090  |
| 108    | 0.163  | 108    | 0.143  | 108    | 0.117  | 108    | 0.130  |
| 109    | 0.362  | 109    | 0.187  | 109    | 0.050  | 109    | 0.140  |
| 110    | 0.327  | 110    | 0.240  | 110    | 0.113  | 110    | 0.397  |
| 111    | 0.143  | 111    | 0.023  | 111    | 0.220  | 111    | 0.153  |
| 112    | 0.127  | 112    | 0.000  | 112    | 0.000  | 112    | 0.000  |
| 113    | 1.753  | 113    | 1.363  | 113    | 1.283  | 113    | 1.870  |
| 114    | 0.498  | 114    | 0.530  | 114    | 0.973  | 114    | 0.543  |
| 115    | 2.663  | 115    | 2.317  | 115    | 1.923  | 115    | 2.743  |
| 116    | 0.517  | 116    | 0.227  | 116    | 1.250  | 116    | 0.360  |
| 117    | 0.047  | 117    | 0.160  | 117    | 0.010  | 117    | 0.070  |
| 118    | 0.023  | 118    | 0.143  | 118    | 0.000  | 118    | 0.037  |
| 119    | 0.233  | 119    | 0.147  | 119    | 0.267  | 119    | 0.297  |
| 120    | 0.440  | 120    | 0.397  | 120    | 0.457  | 120    | 0.283  |
| 121    | 0.563  | 121    | 0.373  | 121    | 0.777  | 121    | 0.567  |
| 122    | 0.250  | 122    | 0.367  | 122    | 0.000  | 122    | 0.290  |
| 123    | 0.000  | 123    | 0.180  | 123    | 0.143  | 123    | 0.103  |
| 124    | 0.117  | 124    | 0.000  | 124    | 0.143  | 124    | 0.123  |
| 125    | 0.280  | 125    | 0.427  | 125    | 0.260  | 125    | 0.353  |
| 126    | 0.027  | 126    | 0.130  | 126    | 0.040  | 126    | 0.000  |
| 127    | 0.000  | 127    | 0.120  | 127    | 0.027  | 127    | 0.007  |
| 128    | 0.103  | 128    | 0.120  | 128    | 0.170  | 128    | 0.237  |
| 129    | 0.033  | 129    | 0.147  | 129    | 0.240  | 129    | 0.060  |
| 130    | 0.000  | 130    | 0.000  | 130    | 0.113  | 130    | 0.000  |
| 131    | 0.000  | 131    | 0.000  | 131    | 0.000  | 131    | 0.000  |
| 132    | 0.000  | 132    | 0.000  | 132    | 0.000  | 132    | 0.037  |
| 133    | 0.012  | 133    | 0.410  | 133    | 0.000  | 133    | 0.000  |
| 134    | 0.950  | 134    | 0.503  | 134    | 0.097  | 134    | 0.773  |
| 135    | 0.447  | 135    | 0.663  | 135    | 0.160  | 135    | 0.497  |
| 136    | 0.500  | 136    | 0.497  | 136    | 0.340  | 136    | 0.603  |
| 137    | 0.170  | 137    | 0.340  | 137    | 0.260  | 137    | 0.173  |
| 138    | 0.000  | 138    | 0.033  | 138    | 0.093  | 138    | 0.083  |
| 139    | 0.073  | 139    | 0.180  | 139    | 0.063  | 139    | 0.110  |
| 140    | 0.000  | 140    | 0.197  | 140    | 0.170  | 140    | 0.143  |
| 141    | 0.003  | 141    | 0.353  | 141    | 0.120  | 141    | 0.163  |
| 142    | 0.003  | 142    | 0.000  | 142    | 0.000  | 142    | 0.000  |
| 143    | 0.033  | 143    | 0.000  | 143    | 0.033  | 143    | 0.000  |
| 144    | 0.543  | 144    | 0.427  | 144    | 0.657  | 144    | 0.760  |
| 145    | 1.313  | 145    | 1.130  | 145    | 0.933  | 145    | 1.303  |
| 146    | 1.083  | 146    | 0.970  | 146    | 1.100  | 146    | 0.890  |
| 147    | 0.257  | 147    | 0.623  | 147    | 0.000  | 147    | 0.060  |
| 148    | 0.440  | 148    | 0.700  | 148    | 0.607  | 148    | 0.727  |
| 149    | 0.080  | 149    | 0.177  | 149    | 0.320  | 149    | 0.250  |

|     |       |     |       |     |       |     |       |
|-----|-------|-----|-------|-----|-------|-----|-------|
| 150 | 0.060 | 150 | 0.193 | 150 | 0.290 | 150 | 0.137 |
| 151 | 0.077 | 151 | 0.057 | 151 | 0.110 | 151 | 0.107 |
| 152 | 0.000 | 152 | 0.000 | 152 | 0.000 | 152 | 0.000 |
| 153 | 0.000 | 153 | 0.000 | 153 | 0.000 | 153 | 0.000 |
| 154 | 0.000 | 154 | 0.000 | 154 | 0.000 | 154 | 0.000 |
| 155 | 0.000 | 155 | 0.000 | 155 | 0.000 | 155 | 0.000 |
| 156 | 0.097 | 156 | 0.093 | 156 | 0.000 | 156 | 0.043 |
| 157 | 0.163 | 157 | 0.203 | 157 | 0.057 | 157 | 0.170 |
| 158 | 0.143 | 158 | 0.000 | 158 | 0.020 | 158 | 0.197 |
| 159 | 0.023 | 159 | 0.000 | 159 | 0.000 | 159 | 0.143 |
| 160 | 0.357 | 160 | 0.000 | 160 | 0.083 | 160 | 0.040 |
| 161 | 0.630 | 161 | 0.937 | 161 | 1.357 | 161 | 1.093 |
| 162 | 0.103 | 162 | 0.120 | 162 | 0.327 | 162 | 0.127 |
| 163 | 0.057 | 163 | 0.180 | 163 | 0.223 | 163 | 0.180 |
| 164 | 0.000 | 164 | 0.167 | 164 | 0.203 | 164 | 0.030 |
| 165 | 0.000 | 165 | 0.000 | 165 | 0.057 | 165 | 0.000 |
| 166 | 0.000 | 166 | 0.067 | 166 | 0.083 | 166 | 0.000 |
| 167 | 0.000 | 167 | 0.350 | 167 | 0.390 | 167 | 0.097 |
| 168 | 0.000 | 168 | 0.000 | 168 | 0.000 | 168 | 0.000 |
| 169 | 0.073 | 169 | 0.370 | 169 | 0.290 | 169 | 0.160 |
| 170 | 0.153 | 170 | 0.147 | 170 | 0.107 | 170 | 0.200 |
| 171 | 0.083 | 171 | 0.100 | 171 | 0.033 | 171 | 0.080 |
| 172 | 0.440 | 172 | 0.347 | 172 | 0.253 | 172 | 0.290 |
| 173 | 0.833 | 173 | 0.623 | 173 | 0.350 | 173 | 0.380 |
| 174 | 0.830 | 174 | 0.533 | 174 | 0.257 | 174 | 0.453 |
| 175 | 0.207 | 175 | 0.193 | 175 | 0.083 | 175 | 0.227 |
| 176 | 0.043 | 176 | 0.253 | 176 | 0.000 | 176 | 0.207 |
| 177 | 0.017 | 177 | 0.040 | 177 | 0.000 | 177 | 0.067 |
| 178 | 0.077 | 178 | 0.250 | 178 | 0.000 | 178 | 0.070 |
| 179 | 0.157 | 179 | 0.153 | 179 | 0.243 | 179 | 0.223 |
| 180 | 0.140 | 180 | 0.190 | 180 | 0.277 | 180 | 0.103 |
| 181 | 0.150 | 181 | 0.130 | 181 | 0.227 | 181 | 0.103 |
| 182 | 0.110 | 182 | 0.250 | 182 | 0.180 | 182 | 0.137 |
| 183 | 0.083 | 183 | 0.183 | 183 | 0.110 | 183 | 0.087 |
| 184 | 0.050 | 184 | 0.127 | 184 | 0.027 | 184 | 0.070 |
| 185 | 0.167 | 185 | 0.257 | 185 | 0.280 | 185 | 0.423 |
| 186 | 0.193 | 186 | 0.217 | 186 | 0.167 | 186 | 0.270 |
| 187 | 0.270 | 187 | 0.703 | 187 | 0.267 | 187 | 0.167 |
| 188 | 0.540 | 188 | 0.547 | 188 | 0.513 | 188 | 0.563 |
| 189 | 0.067 | 189 | 0.217 | 189 | 0.270 | 189 | 0.197 |
| 190 | 0.153 | 190 | 0.283 | 190 | 0.363 | 190 | 0.270 |
| 191 | 0.170 | 191 | 0.147 | 191 | 0.180 | 191 | 0.147 |
| 192 | 0.177 | 192 | 0.227 | 192 | 0.087 | 192 | 0.103 |
| 193 | 0.270 | 193 | 0.027 | 193 | 0.000 | 193 | 0.203 |
| 194 | 0.337 | 194 | 0.223 | 194 | 0.130 | 194 | 0.253 |
| 195 | 0.447 | 195 | 0.437 | 195 | 0.120 | 195 | 0.347 |
| 196 | 0.480 | 196 | 0.333 | 196 | 0.483 | 196 | 0.373 |
| 197 | 0.470 | 197 | 0.380 | 197 | 0.730 | 197 | 0.583 |
| 198 | 0.240 | 198 | 0.197 | 198 | 0.620 | 198 | 0.223 |
| 199 | 0.013 | 199 | 0.007 | 199 | 0.000 | 199 | 0.047 |
| 200 | 0.133 | 200 | 0.037 | 200 | 0.047 | 200 | 0.037 |
| 201 | 0.033 | 201 | 0.033 | 201 | 0.000 | 201 | 0.027 |
| 202 | 0.043 | 202 | 0.017 | 202 | 0.000 | 202 | 0.093 |
| 203 | 0.190 | 203 | 0.157 | 203 | 0.957 | 203 | 0.343 |

|     |       |     |       |     |       |     |       |
|-----|-------|-----|-------|-----|-------|-----|-------|
| 204 | 0.063 | 204 | 0.140 | 204 | 0.137 | 204 | 0.200 |
| 205 | 0.233 | 205 | 0.457 | 205 | 0.190 | 205 | 0.243 |
| 206 | 0.593 | 206 | 0.177 | 206 | 0.440 | 206 | 0.253 |
| 207 | 0.653 | 207 | 0.137 | 207 | 0.347 | 207 | 0.277 |
| 208 | 0.590 | 208 | 0.150 | 208 | 0.317 | 208 | 0.240 |
| 209 | 0.923 | 209 | 0.123 | 209 | 0.187 | 209 | 0.527 |
| 210 | 0.500 | 210 | 0.127 | 210 | 0.620 | 210 | 0.223 |
| 211 | 0.013 | 211 | 0.000 | 211 | 0.000 | 211 | 0.000 |
| 212 | 0.000 | 212 | 0.000 | 212 | 0.000 | 212 | 0.000 |
| 213 | 0.010 | 213 | 0.000 | 213 | 0.000 | 213 | 0.000 |
| 214 | 0.017 | 214 | 0.000 | 214 | 0.000 | 214 | 0.000 |
| 215 | 0.110 | 215 | 0.180 | 215 | 0.197 | 215 | 0.097 |
| 216 | 0.270 | 216 | 0.337 | 216 | 0.340 | 216 | 0.263 |
| 217 | 0.073 | 217 | 0.143 | 217 | 0.000 | 217 | 0.000 |
| 218 | 0.223 | 218 | 0.223 | 218 | 0.000 | 218 | 0.297 |
| 219 | 0.290 | 219 | 0.333 | 219 | 0.227 | 219 | 0.307 |
| 220 | 0.210 | 220 | 0.327 | 220 | 0.213 | 220 | 0.337 |
| 221 | 0.163 | 221 | 0.303 | 221 | 0.203 | 221 | 0.107 |
| 222 | 0.037 | 222 | 0.227 | 222 | 0.040 | 222 | 0.013 |
| 223 | 0.060 | 223 | 0.270 | 223 | 0.250 | 223 | 0.120 |
| 224 | 0.233 | 224 | 0.187 | 224 | 0.600 | 224 | 0.160 |
| 225 | 0.100 | 225 | 0.000 | 225 | 0.000 | 225 | 0.000 |
| 226 | 0.133 | 226 | 0.000 | 226 | 0.060 | 226 | 0.000 |
| 227 | 0.283 | 227 | 0.233 | 227 | 1.140 | 227 | 0.313 |
| 228 | 0.593 | 228 | 0.267 | 228 | 1.637 | 228 | 0.553 |
| 229 | 0.397 | 229 | 0.313 | 229 | 1.357 | 229 | 0.317 |
| 230 | 0.183 | 230 | 0.430 | 230 | 0.000 | 230 | 0.067 |
| 231 | 0.463 | 231 | 0.270 | 231 | 0.187 | 231 | 0.457 |
| 232 | 0.463 | 232 | 0.477 | 232 | 0.410 | 232 | 0.433 |
| 233 | 0.357 | 233 | 0.700 | 233 | 0.000 | 233 | 0.003 |
| 234 | 0.663 | 234 | 0.463 | 234 | 0.103 | 234 | 0.747 |
| 235 | 0.567 | 235 | 0.837 | 235 | 0.000 | 235 | 0.173 |
| 236 | 0.750 | 236 | 0.313 | 236 | 0.140 | 236 | 0.900 |
| 237 | 1.157 | 237 | 0.757 | 237 | 0.687 | 237 | 1.367 |
| 238 | 0.463 | 238 | 0.000 | 238 | 0.027 | 238 | 0.277 |
| 239 | 0.230 | 239 | 0.093 | 239 | 0.137 | 239 | 0.257 |
| 240 | 0.030 | 240 | 0.120 | 240 | 0.120 | 240 | 0.093 |
| 241 | 0.033 | 241 | 0.090 | 241 | 0.200 | 241 | 0.053 |
| 242 | 0.053 | 242 | 0.000 | 242 | 0.230 | 242 | 0.087 |
| 243 | 0.173 | 243 | 0.007 | 243 | 0.187 | 243 | 0.143 |
| 244 | 0.050 | 244 | 0.000 | 244 | 0.000 | 244 | 0.077 |
| 245 | 0.090 | 245 | 0.107 | 245 | 0.107 | 245 | 0.087 |
| 246 | 0.000 | 246 | 0.000 | 246 | 0.000 | 246 | 0.000 |
| 247 | 0.000 | 247 | 0.000 | 247 | 0.000 | 247 | 0.000 |
| 248 | 0.000 | 248 | 0.000 | 248 | 0.000 | 248 | 0.000 |
| 249 | 1.557 | 249 | 0.927 | 249 | 0.063 | 249 | 1.853 |
| 250 | 0.227 | 250 | 0.000 | 250 | 0.000 | 250 | 0.033 |
| 251 | 0.000 | 251 | 0.000 | 251 | 0.037 | 251 | 0.000 |
| 252 | 0.047 | 252 | 0.073 | 252 | 0.277 | 252 | 0.230 |
| 253 | 0.400 | 253 | 0.083 | 253 | 0.873 | 253 | 0.043 |
| 254 | 0.173 | 254 | 0.000 | 254 | 0.100 | 254 | 0.143 |
| 255 | 0.080 | 255 | 0.000 | 255 | 0.000 | 255 | 0.063 |
| 256 | 0.390 | 256 | 0.000 | 256 | 0.000 | 256 | 0.537 |
| 257 | 1.217 | 257 | 0.833 | 257 | 0.417 | 257 | 1.290 |

|     |       |     |       |     |       |     |       |
|-----|-------|-----|-------|-----|-------|-----|-------|
| 258 | 1.427 | 258 | 1.107 | 258 | 1.267 | 258 | 1.383 |
| 259 | 0.153 | 259 | 0.000 | 259 | 0.443 | 259 | 0.113 |
| 260 | 0.027 | 260 | 0.017 | 260 | 0.287 | 260 | 0.050 |
| 261 | 0.000 | 261 | 0.000 | 261 | 0.323 | 261 | 0.020 |
| 262 | 0.167 | 262 | 0.113 | 262 | 1.350 | 262 | 0.330 |
| 263 | 0.227 | 263 | 0.073 | 263 | 0.137 | 263 | 0.247 |
| 264 | 0.223 | 264 | 0.263 | 264 | 0.183 | 264 | 0.193 |
| 265 | 0.540 | 265 | 0.233 | 265 | 0.210 | 265 | 0.440 |
| 266 | 0.667 | 266 | 0.330 | 266 | 0.290 | 266 | 0.580 |
| 267 | 0.217 | 267 | 0.623 | 267 | 0.000 | 267 | 0.073 |
| 268 | 0.160 | 268 | 0.440 | 268 | 0.000 | 268 | 0.407 |
| 269 | 0.313 | 269 | 0.283 | 269 | 0.210 | 269 | 0.623 |
| 270 | 0.213 | 270 | 0.210 | 270 | 0.167 | 270 | 0.070 |
| 271 | 0.050 | 271 | 0.127 | 271 | 0.000 | 271 | 0.197 |
| 272 | 0.000 | 272 | 0.000 | 272 | 0.000 | 272 | 0.000 |
| 273 | 0.003 | 273 | 0.000 | 273 | 0.013 | 273 | 0.000 |
| 274 | 0.033 | 274 | 0.080 | 274 | 0.137 | 274 | 0.057 |
| 275 | 0.150 | 275 | 0.163 | 275 | 0.310 | 275 | 0.423 |
| 276 | 0.003 | 276 | 0.050 | 276 | 0.323 | 276 | 0.163 |
| 277 | 0.140 | 277 | 0.123 | 277 | 0.423 | 277 | 0.133 |
| 278 | 2.567 | 278 | 0.347 | 278 | 0.973 | 278 | 0.220 |
| 279 | 1.037 | 279 | 0.263 | 279 | 0.657 | 279 | 0.163 |
| 280 | 1.233 | 280 | 0.127 | 280 | 0.367 | 280 | 0.277 |
| 281 | 2.967 | 281 | 0.273 | 281 | 1.220 | 281 | 1.510 |
| 282 | 0.577 | 282 | 1.003 | 282 | 1.723 | 282 | 2.217 |
| 283 | 0.107 | 283 | 0.170 | 283 | 0.687 | 283 | 1.390 |
| 284 | 0.007 | 284 | 1.117 | 284 | 1.273 | 284 | 2.237 |
| 285 | 0.140 | 285 | 1.037 | 285 | 1.097 | 285 | 1.653 |
| 286 | 0.650 | 286 | 0.073 | 286 | 0.670 | 286 | 1.810 |
| 287 | 1.077 | 287 | 0.880 | 287 | 1.093 | 287 | 3.117 |
| 288 | 0.870 | 288 | 0.123 | 288 | 0.213 | 288 | 1.217 |
| 289 | 0.023 | 289 | 0.037 | 289 | 0.000 | 289 | 0.090 |
| 290 | 0.013 | 290 | 0.953 | 290 | 0.000 | 290 | 0.000 |
| 291 | 0.037 | 291 | 0.197 | 291 | 0.853 | 291 | 0.023 |
| 292 | 0.000 | 292 | 0.390 | 292 | 0.130 | 292 | 0.007 |
| 293 | 0.063 | 293 | 0.107 | 293 | 0.263 | 293 | 0.110 |
| 294 | 0.000 | 294 | 0.253 | 294 | 0.497 | 294 | 0.357 |
| 295 | 0.207 | 295 | 0.970 | 295 | 0.460 | 295 | 0.697 |
| 296 | 0.000 | 296 | 1.037 | 296 | 0.483 | 296 | 1.400 |
| 297 | 0.520 | 297 | 0.707 | 297 | 0.290 | 297 | 1.143 |
| 298 | 0.977 | 298 | 0.053 | 298 | 0.310 | 298 | 0.040 |
| 299 | 1.217 | 299 | 0.143 | 299 | 0.683 | 299 | 0.107 |
| 300 | 0.817 | 300 | 0.080 | 300 | 0.010 | 300 | 0.077 |
| 301 | 0.637 | 301 | 0.000 | 301 | 0.173 | 301 | 0.000 |
| 302 | 0.307 | 302 | 0.000 | 302 | 0.043 | 302 | 0.000 |
| 303 | 0.223 | 303 | 0.000 | 303 | 0.000 | 303 | 0.000 |
| 304 | 0.103 | 304 | 0.320 | 304 | 0.047 | 304 | 0.200 |
| 305 | 0.293 | 305 | 0.330 | 305 | 0.070 | 305 | 0.000 |
| 306 | 0.130 | 306 | 0.433 | 306 | 0.227 | 306 | 0.717 |
| 307 | 0.110 | 307 | 1.040 | 307 | 1.243 | 307 | 1.167 |
| 308 | 0.010 | 308 | 1.343 | 308 | 1.827 | 308 | 1.360 |
| 309 | 0.007 | 309 | 0.830 | 309 | 1.167 | 309 | 0.880 |
| 310 | 0.290 | 310 | 0.677 | 310 | 1.050 | 310 | 0.783 |
| 311 | 0.583 | 311 | 0.357 | 311 | 0.640 | 311 | 0.473 |

|     |       |     |       |     |       |     |       |
|-----|-------|-----|-------|-----|-------|-----|-------|
| 312 | 0.157 | 312 | 0.293 | 312 | 0.393 | 312 | 0.320 |
| 313 | 0.207 | 313 | 0.233 | 313 | 0.017 | 313 | 0.210 |
| 314 | 0.060 | 314 | 0.223 | 314 | 0.387 | 314 | 0.307 |
| 315 | 0.147 | 315 | 0.057 | 315 | 0.140 | 315 | 0.093 |
| 316 | 0.270 | 316 | 0.000 | 316 | 0.023 | 316 | 0.033 |
| 317 | 0.000 | 317 | 0.000 | 317 | 0.060 | 317 | 0.030 |
| 318 | 0.000 | 318 | 0.000 | 318 | 0.027 | 318 | 0.057 |
| 319 | 0.340 | 319 | 0.083 | 319 | 0.820 | 319 | 0.403 |
| 320 | 0.713 | 320 | 0.590 | 320 | 0.903 | 320 | 0.673 |
| 321 | 0.893 | 321 | 0.057 | 321 | 0.030 | 321 | 0.090 |
| 322 | 1.300 | 322 | 0.243 | 322 | 0.290 | 322 | 0.220 |
| 323 | 1.060 | 323 | 0.020 | 323 | 0.047 | 323 | 0.033 |
| 324 | 0.927 | 324 | 0.127 | 324 | 0.127 | 324 | 0.063 |
| 325 | 0.260 | 325 | 0.027 | 325 | 0.310 | 325 | 0.260 |
| 326 | 0.070 | 326 | 0.000 | 326 | 0.107 | 326 | 0.010 |
| 327 | 0.177 | 327 | 0.000 | 327 | 0.057 | 327 | 0.000 |
| 328 | 0.387 | 328 | 0.323 | 328 | 0.430 | 328 | 0.293 |
| 329 | 0.063 | 329 | 1.540 | 329 | 0.683 | 329 | 0.277 |
| 330 | 0.070 | 330 | 0.797 | 330 | 0.903 | 330 | 1.017 |
| 331 | 0.033 | 331 | 1.183 | 331 | 1.427 | 331 | 1.577 |
| 332 | 0.133 | 332 | 1.137 | 332 | 1.263 | 332 | 1.240 |
| 333 | 0.177 | 333 | 0.817 | 333 | 0.950 | 333 | 1.007 |
| 334 | 0.147 | 334 | 0.160 | 334 | 0.353 | 334 | 0.327 |
| 335 | 1.113 | 335 | 0.000 | 335 | 0.077 | 335 | 0.057 |
| 336 | 0.183 | 336 | 0.123 | 336 | 0.057 | 336 | 0.050 |
| 337 | 0.703 | 337 | 0.420 | 337 | 0.300 | 337 | 0.380 |
| 338 | 0.707 | 338 | 0.013 | 338 | 0.077 | 338 | 0.037 |
| 339 | 0.813 | 339 | 0.000 | 339 | 0.343 | 339 | 0.017 |
| 340 | 0.057 | 340 | 0.000 | 340 | 0.227 | 340 | 0.067 |
| 341 | 0.157 | 341 | 0.123 | 341 | 0.513 | 341 | 0.263 |
| 342 | 0.437 | 342 | 0.097 | 342 | 0.407 | 342 | 0.053 |
| 343 | 0.000 | 343 | 0.440 | 343 | 0.100 | 343 | 0.177 |
| 344 | 0.000 | 344 | 1.287 | 344 | 0.613 | 344 | 1.210 |
| 345 | 0.263 | 345 | 0.430 | 345 | 0.200 | 345 | 0.257 |
| 346 | 3.233 | 346 | 1.067 | 346 | 0.873 | 346 | 0.840 |
| 347 | 0.270 | 347 | 1.040 | 347 | 0.853 | 347 | 0.790 |
| 348 | 0.290 | 348 | 1.030 | 348 | 0.913 | 348 | 0.877 |
| 349 | 0.417 | 349 | 0.000 | 349 | 0.000 | 349 | 0.000 |
| 350 | 0.413 | 350 | 0.057 | 350 | 0.000 | 350 | 0.057 |
| 351 | 0.653 | 351 | 0.283 | 351 | 0.147 | 351 | 0.273 |
| 352 | 0.777 | 352 | 0.000 | 352 | 0.000 | 352 | 0.030 |
| 353 | 0.283 | 353 | 0.000 | 353 | 0.000 | 353 | 0.000 |
| 354 | 0.103 | 354 | 0.260 | 354 | 0.330 | 354 | 0.257 |
| 355 | 0.050 | 355 | 2.690 | 355 | 2.797 | 355 | 3.373 |
| 356 | 0.003 | 356 | 0.153 | 356 | 0.367 | 356 | 0.310 |
| 357 | 0.140 | 357 | 0.143 | 357 | 0.353 | 357 | 0.403 |
| 358 | 0.023 | 358 | 0.260 | 358 | 0.477 | 358 | 0.470 |
| 359 | 0.000 | 359 | 0.687 | 359 | 0.393 | 359 | 0.380 |
| 360 | 0.050 | 360 | 0.527 | 360 | 0.867 | 360 | 0.730 |
| 361 | 0.000 | 361 | 1.653 | 361 | 0.523 | 361 | 0.287 |
| 362 | 0.013 | 362 | 0.207 | 362 | 0.287 | 362 | 0.363 |
| 363 | 0.140 | 363 | 0.143 | 363 | 0.153 | 363 | 0.167 |
| 364 | 0.627 | 364 | 0.070 | 364 | 0.037 | 364 | 0.080 |
| 365 | 1.543 | 365 | 0.000 | 365 | 0.000 | 365 | 0.020 |

|     |       |     |       |     |       |     |       |
|-----|-------|-----|-------|-----|-------|-----|-------|
| 366 | 3.403 | 366 | 0.207 | 366 | 0.107 | 366 | 0.090 |
| 367 | 2.390 | 367 | 0.197 | 367 | 0.000 | 367 | 0.090 |
| 368 | 2.607 | 368 | 0.077 | 368 | 0.000 | 368 | 0.010 |
| 369 | 0.040 | 369 | 0.060 | 369 | 0.027 | 369 | 0.057 |
| 370 | 0.000 | 370 | 0.000 | 370 | 0.000 | 370 | 0.000 |
| 371 | 0.000 | 371 | 0.000 | 371 | 0.000 | 371 | 0.000 |
| 372 | 0.000 | 372 | 0.060 | 372 | 0.070 | 372 | 0.153 |
| 373 | 0.000 | 373 | 0.517 | 373 | 0.753 | 373 | 0.743 |
| 374 | 0.000 | 374 | 1.883 | 374 | 1.873 | 374 | 1.847 |
| 375 | 0.000 | 375 | 3.077 | 375 | 3.800 | 375 | 4.137 |
| 376 | 0.020 | 376 | 2.150 | 376 | 2.443 | 376 | 2.747 |
| 377 | 0.037 | 377 | 2.377 | 377 | 2.577 | 377 | 2.930 |
| 378 | 0.910 | 378 | 0.043 | 378 | 0.077 | 378 | 0.057 |
| 379 | 1.077 | 379 | 0.000 | 379 | 0.000 | 379 | 0.010 |
| 380 | 1.117 | 380 | 0.000 | 380 | 0.000 | 380 | 0.000 |
| 381 | 0.190 | 381 | 0.000 | 381 | 0.000 | 381 | 0.000 |
| 382 | 0.040 | 382 | 0.000 | 382 | 0.000 | 382 | 0.000 |
| 383 | 0.007 | 383 | 0.000 | 383 | 0.000 | 383 | 0.000 |
| 384 | 0.077 | 384 | 0.000 | 384 | 0.000 | 384 | 0.000 |
| 385 | 0.033 | 385 | 0.000 | 385 | 0.000 | 385 | 0.000 |
| 386 | 0.117 | 386 | 0.023 | 386 | 0.000 | 386 | 0.000 |
| 387 | 0.380 | 387 | 1.297 | 387 | 0.860 | 387 | 1.093 |
| 388 | 0.730 | 388 | 3.343 | 388 | 0.140 | 388 | 1.163 |
| 389 | 0.143 | 389 | 0.957 | 389 | 0.337 | 389 | 1.477 |
| 390 | 0.103 | 390 | 0.197 | 390 | 0.160 | 390 | 0.270 |
| 391 | 0.117 | 391 | 0.010 | 391 | 0.043 | 391 | 0.047 |
| 392 | 0.160 | 392 | 0.027 | 392 | 0.020 | 392 | 0.000 |
| 393 | 0.300 | 393 | 0.043 | 393 | 0.050 | 393 | 0.053 |
| 394 | 0.460 | 394 | 0.080 | 394 | 0.017 | 394 | 0.000 |
| 395 | 0.477 | 395 | 0.097 | 395 | 0.127 | 395 | 0.057 |
| 396 | 0.370 | 396 | 0.287 | 396 | 0.430 | 396 | 0.477 |
| 397 | 0.953 | 397 | 0.533 | 397 | 0.500 | 397 | 0.757 |
| 398 | 0.637 | 398 | 0.080 | 398 | 0.203 | 398 | 0.160 |
| 399 | 0.377 | 399 | 0.007 | 399 | 0.203 | 399 | 0.070 |
| 400 | 0.767 | 400 | 0.080 | 400 | 0.190 | 400 | 0.187 |
| 401 | 0.823 | 401 | 0.113 | 401 | 0.023 | 401 | 0.150 |
| 402 | 0.700 | 402 | 1.320 | 402 | 0.030 | 402 | 0.347 |
| 403 | 0.610 | 403 | 0.347 | 403 | 0.393 | 403 | 0.497 |
| 404 | 0.673 | 404 | 0.357 | 404 | 0.203 | 404 | 0.477 |
| 405 | 0.757 | 405 | 0.407 | 405 | 0.030 | 405 | 0.430 |
| 406 | 0.600 | 406 | 0.723 | 406 | 1.033 | 406 | 1.143 |
| 407 | 0.750 | 407 | 2.097 | 407 | 0.010 | 407 | 0.243 |
| 408 | 0.843 | 408 | 0.357 | 408 | 0.097 | 408 | 0.420 |
| 409 | 0.683 | 409 | 0.750 | 409 | 0.677 | 409 | 0.770 |
| 410 | 0.783 | 410 | 1.797 | 410 | 0.793 | 410 | 0.807 |
| 411 | 0.507 | 411 | 0.597 | 411 | 0.643 | 411 | 0.700 |
| 412 | 0.677 | 412 | 0.457 | 412 | 0.517 | 412 | 0.680 |
| 413 | 0.573 | 413 | 0.493 | 413 | 0.640 | 413 | 0.693 |
| 414 | 0.573 | 414 | 0.587 | 414 | 0.753 | 414 | 0.783 |
| 415 | 0.357 | 415 | 0.470 | 415 | 0.497 | 415 | 0.590 |
| 416 | 0.370 | 416 | 0.620 | 416 | 0.527 | 416 | 0.707 |
| 417 | 0.220 | 417 | 0.703 | 417 | 0.630 | 417 | 0.807 |
| 418 | 0.000 | 418 | 1.150 | 418 | 0.433 | 418 | 0.593 |
| 419 | 0.167 | 419 | 0.727 | 419 | 0.513 | 419 | 0.820 |

|     |       |     |       |     |       |     |       |
|-----|-------|-----|-------|-----|-------|-----|-------|
| 420 | 0.313 | 420 | 0.507 | 420 | 0.270 | 420 | 0.463 |
| 421 | 0.507 | 421 | 1.973 | 421 | 0.213 | 421 | 0.293 |
| 422 | 0.777 | 422 | 0.550 | 422 | 0.120 | 422 | 0.457 |
| 423 | 0.600 | 423 | 0.517 | 423 | 0.233 | 423 | 0.670 |
| 424 | 0.603 | 424 | 0.347 | 424 | 0.213 | 424 | 0.367 |
| 425 | 0.767 | 425 | 0.320 | 425 | 0.190 | 425 | 0.377 |
| 426 | 0.323 | 426 | 0.187 | 426 | 0.107 | 426 | 0.190 |
| 427 | 0.213 | 427 | 0.007 | 427 | 0.000 | 427 | 0.000 |
| 428 | 0.100 | 428 | 1.443 | 428 | 0.000 | 428 | 0.063 |
| 429 | 0.193 | 429 | 0.270 | 429 | 0.093 | 429 | 0.317 |
| 430 | 0.227 | 430 | 0.670 | 430 | 0.277 | 430 | 0.603 |
| 431 | 0.087 | 431 | 2.050 | 431 | 0.493 | 431 | 0.767 |
| 432 | 0.097 | 432 | 0.617 | 432 | 0.740 | 432 | 0.780 |
| 433 | 0.020 | 433 | 0.563 | 433 | 0.857 | 433 | 0.760 |
| 434 | 0.000 | 434 | 0.663 | 434 | 1.030 | 434 | 0.850 |
| 435 | 0.000 | 435 | 0.280 | 435 | 0.387 | 435 | 0.337 |
| 436 | 0.540 | 436 | 0.230 | 436 | 0.160 | 436 | 0.297 |
| 437 | 1.000 | 437 | 0.180 | 437 | 0.060 | 437 | 0.153 |
| 438 | 1.487 | 438 | 0.323 | 438 | 0.187 | 438 | 0.260 |
| 439 | 0.950 | 439 | 0.263 | 439 | 0.177 | 439 | 0.283 |
| 440 | 1.343 | 440 | 0.110 | 440 | 0.007 | 440 | 0.003 |
| 441 | 0.747 | 441 | 0.097 | 441 | 0.000 | 441 | 0.063 |
| 442 | 0.077 | 442 | 0.057 | 442 | 0.007 | 442 | 0.000 |
| 443 | 0.053 | 443 | 0.000 | 443 | 0.000 | 443 | 0.000 |
| 444 | 0.287 | 444 | 0.000 | 444 | 0.000 | 444 | 0.000 |
| 445 | 0.600 | 445 | 0.473 | 445 | 0.690 | 445 | 0.603 |
| 446 | 0.777 | 446 | 0.760 | 446 | 1.027 | 446 | 1.200 |
| 447 | 0.743 | 447 | 1.247 | 447 | 1.957 | 447 | 1.710 |
| 448 | 0.683 | 448 | 0.950 | 448 | 1.397 | 448 | 1.257 |
| 449 | 0.000 | 449 | 1.187 | 449 | 1.487 | 449 | 1.560 |
| 450 | 0.050 | 450 | 0.627 | 450 | 0.707 | 450 | 0.710 |
| 451 | 0.027 | 451 | 0.023 | 451 | 0.023 | 451 | 0.007 |
| 452 | 0.000 | 452 | 0.027 | 452 | 0.150 | 452 | 0.013 |
| 453 | 0.000 | 453 | 0.273 | 453 | 0.597 | 453 | 0.373 |
| 454 | 0.000 | 454 | 0.517 | 454 | 0.890 | 454 | 0.690 |
| 455 | 0.000 | 455 | 0.873 | 455 | 1.417 | 455 | 1.020 |
| 456 | 0.267 | 456 | 0.693 | 456 | 1.210 | 456 | 0.883 |
| 457 | 0.723 | 457 | 0.663 | 457 | 0.853 | 457 | 0.830 |
| 458 | 1.400 | 458 | 0.033 | 458 | 0.010 | 458 | 0.000 |
| 459 | 1.077 | 459 | 0.100 | 459 | 0.103 | 459 | 0.020 |
| 460 | 0.920 | 460 | 0.093 | 460 | 0.097 | 460 | 0.073 |
| 461 | 1.060 | 461 | 0.000 | 461 | 0.030 | 461 | 0.000 |
| 462 | 0.640 | 462 | 0.000 | 462 | 0.000 | 462 | 0.000 |
| 463 | 0.703 | 463 | 0.000 | 463 | 0.000 | 463 | 0.000 |
| 464 | 0.853 | 464 | 0.000 | 464 | 0.000 | 464 | 0.000 |
| 465 | 0.657 | 465 | 0.483 | 465 | 0.083 | 465 | 0.300 |
| 466 | 0.383 | 466 | 0.893 | 466 | 0.333 | 466 | 0.773 |
| 467 | 0.003 | 467 | 2.907 | 467 | 0.940 | 467 | 1.353 |
| 468 | 0.683 | 468 | 1.247 | 468 | 0.697 | 468 | 1.220 |
| 469 | 0.180 | 469 | 0.863 | 469 | 0.910 | 469 | 1.053 |
| 470 | 0.000 | 470 | 0.987 | 470 | 1.167 | 470 | 1.303 |
| 471 | 0.157 | 471 | 0.590 | 471 | 0.737 | 471 | 0.713 |
| 472 | 0.580 | 472 | 0.777 | 472 | 1.020 | 472 | 0.900 |
| 473 | 0.743 | 473 | 1.293 | 473 | 1.417 | 473 | 1.003 |



|     |       |     |       |     |       |     |       |
|-----|-------|-----|-------|-----|-------|-----|-------|
| 474 | 0.740 | 474 | 0.787 | 474 | 1.150 | 474 | 0.750 |
| 475 | 0.457 | 475 | 2.490 | 475 | 0.073 | 475 | 0.157 |
| 476 | 0.017 | 476 | 0.070 | 476 | 0.087 | 476 | 0.013 |
| 477 | 0.063 | 477 | 0.683 | 477 | 1.003 | 477 | 0.887 |
| 478 | 0.307 | 478 | 0.117 | 478 | 0.147 | 478 | 0.200 |
| 479 | 0.653 | 479 | 0.000 | 479 | 0.000 | 479 | 0.000 |
| 480 | 0.000 | 480 | 0.260 | 480 | 0.120 | 480 | 0.187 |
| 481 | 0.000 | 481 | 0.687 | 481 | 0.403 | 481 | 0.683 |
| 482 | 0.000 | 482 | 0.697 | 482 | 0.477 | 482 | 0.863 |
| 483 | 0.060 | 483 | 0.683 | 483 | 0.320 | 483 | 0.813 |
| 484 | 0.107 | 484 | 0.570 | 484 | 0.233 | 484 | 0.557 |
| 485 | 0.017 | 485 | 0.140 | 485 | 0.027 | 485 | 0.073 |
| 486 | 0.000 | 486 | 0.220 | 486 | 0.130 | 486 | 0.137 |
| 487 | 0.013 | 487 | 0.220 | 487 | 0.200 | 487 | 0.327 |
| 488 | 0.627 | 488 | 0.490 | 488 | 0.380 | 488 | 0.650 |
| 489 | 0.027 | 489 | 0.000 | 489 | 0.000 | 489 | 0.007 |
| 490 | 0.000 | 490 | 0.000 | 490 | 0.000 | 490 | 0.000 |
| 491 | 0.177 | 491 | 0.097 | 491 | 0.000 | 491 | 0.000 |
| 492 | 0.240 | 492 | 0.013 | 492 | 0.100 | 492 | 0.070 |
| 493 | 0.423 | 493 | 0.033 | 493 | 0.173 | 493 | 0.113 |
| 494 | 0.710 | 494 | 0.027 | 494 | 0.007 | 494 | 0.010 |
| 495 | 1.003 | 495 | 0.000 | 495 | 0.000 | 495 | 0.000 |
| 496 | 0.280 | 496 | 0.123 | 496 | 0.187 | 496 | 0.093 |
| 497 | 0.733 | 497 | 0.530 | 497 | 0.880 | 497 | 0.740 |
| 498 | 0.090 | 498 | 0.353 | 498 | 0.050 | 498 | 0.243 |
| 499 | 0.000 | 499 | 0.020 | 499 | 0.000 | 499 | 0.000 |
| 500 | 0.000 | 500 | 0.427 | 500 | 0.303 | 500 | 0.303 |
| 501 | 0.143 | 501 | 0.380 | 501 | 0.227 | 501 | 0.237 |
| 502 | 0.000 | 502 | 0.637 | 502 | 0.317 | 502 | 0.150 |
| 503 | 0.317 | 503 | 0.847 | 503 | 0.410 | 503 | 0.077 |
| 504 | 0.033 | 504 | 0.990 | 504 | 0.543 | 504 | 0.917 |
| 505 | 0.000 | 505 | 0.437 | 505 | 0.047 | 505 | 0.327 |
| 506 | 0.000 | 506 | 0.640 | 506 | 0.483 | 506 | 0.790 |
| 507 | 0.000 | 507 | 0.083 | 507 | 0.007 | 507 | 0.073 |
| 508 | 0.017 | 508 | 0.420 | 508 | 0.000 | 508 | 0.000 |
| 509 | 0.000 | 509 | 0.000 | 509 | 0.037 | 509 | 0.000 |
| 510 | 0.000 | 510 | 0.237 | 510 | 0.100 | 510 | 0.130 |
| 511 | 0.000 | 511 | 0.197 | 511 | 0.000 | 511 | 0.000 |
| 512 | 0.053 | 512 | 0.307 | 512 | 0.167 | 512 | 0.300 |
| 513 | 0.257 | 513 | 0.033 | 513 | 0.007 | 513 | 0.037 |
| 514 | 0.000 | 514 | 0.000 | 514 | 0.000 | 514 | 0.000 |
| 515 | 0.043 | 515 | 0.100 | 515 | 0.000 | 515 | 0.000 |
| 516 | 0.323 | 516 | 0.000 | 516 | 0.000 | 516 | 0.000 |
| 517 | 0.000 | 517 | 0.000 | 517 | 0.033 | 517 | 0.040 |
| 518 | 0.000 | 518 | 0.000 | 518 | 0.000 | 518 | 0.000 |
| 519 | 0.000 | 519 | 0.000 | 519 | 0.097 | 519 | 0.000 |
| 520 | 0.000 | 520 | 0.200 | 520 | 0.287 | 520 | 0.000 |
| 521 | 0.000 | 521 | 0.110 | 521 | 0.110 | 521 | 0.073 |
| 522 | 0.373 | 522 | 0.383 | 522 | 0.300 | 522 | 0.247 |
| 523 | 0.120 | 523 | 0.573 | 523 | 0.000 | 523 | 0.000 |
| 524 | 0.190 | 524 | 0.000 | 524 | 0.157 | 524 | 0.047 |
| 525 | 0.373 | 525 | 0.240 | 525 | 0.257 | 525 | 0.300 |
| 526 | 0.180 | 526 | 0.000 | 526 | 0.000 | 526 | 0.000 |
| 527 | 0.100 | 527 | 0.000 | 527 | 0.000 | 527 | 0.000 |

|     |       |     |       |     |       |     |       |
|-----|-------|-----|-------|-----|-------|-----|-------|
| 528 | 0.140 | 528 | 0.000 | 528 | 0.000 | 528 | 0.000 |
| 529 | 0.503 | 529 | 0.260 | 529 | 0.093 | 529 | 0.000 |
| 530 | 0.397 | 530 | 2.643 | 530 | 0.000 | 530 | 0.000 |
| 531 | 0.297 | 531 | 0.737 | 531 | 0.410 | 531 | 0.360 |
| 532 | 0.010 | 532 | 0.077 | 532 | 0.077 | 532 | 0.100 |
| 533 | 0.063 | 533 | 0.267 | 533 | 0.230 | 533 | 0.207 |
| 534 | 0.350 | 534 | 0.663 | 534 | 0.470 | 534 | 0.393 |
| 535 | 0.643 | 535 | 0.087 | 535 | 0.160 | 535 | 0.130 |
| 536 | 0.687 | 536 | 0.053 | 536 | 0.007 | 536 | 0.037 |
| 537 | 0.737 | 537 | 0.387 | 537 | 0.060 | 537 | 0.017 |
| 538 | 0.780 | 538 | 0.617 | 538 | 0.460 | 538 | 0.593 |
| 539 | 1.167 | 539 | 0.640 | 539 | 0.367 | 539 | 0.423 |
| 540 | 0.053 | 540 | 0.240 | 540 | 0.150 | 540 | 0.223 |
| 541 | 0.053 | 541 | 0.037 | 541 | 0.000 | 541 | 0.000 |
| 542 | 0.117 | 542 | 0.327 | 542 | 0.033 | 542 | 0.000 |
| 543 | 0.327 | 543 | 0.290 | 543 | 0.197 | 543 | 0.377 |
| 544 | 0.577 | 544 | 0.607 | 544 | 0.587 | 544 | 0.747 |
| 545 | 0.447 | 545 | 0.640 | 545 | 0.547 | 545 | 0.773 |
| 546 | 0.007 | 546 | 0.840 | 546 | 0.503 | 546 | 0.743 |
| 547 | 0.000 | 547 | 1.790 | 547 | 0.500 | 547 | 0.493 |
| 548 | 0.030 | 548 | 1.053 | 548 | 0.957 | 548 | 1.100 |
| 549 | 0.173 | 549 | 0.003 | 549 | 0.000 | 549 | 0.033 |
| 550 | 0.210 | 550 | 0.007 | 550 | 0.000 | 550 | 0.000 |
| 551 | 0.233 | 551 | 0.050 | 551 | 0.000 | 551 | 0.117 |
| 552 | 0.527 | 552 | 0.220 | 552 | 0.247 | 552 | 0.407 |
| 553 | 0.607 | 553 | 0.680 | 553 | 0.320 | 553 | 0.557 |
| 554 | 0.340 | 554 | 0.580 | 554 | 0.240 | 554 | 0.297 |
| 555 | 0.100 | 555 | 0.037 | 555 | 0.000 | 555 | 0.000 |
| 556 | 0.010 | 556 | 0.000 | 556 | 0.000 | 556 | 0.000 |
| 557 | 0.187 | 557 | 0.000 | 557 | 0.223 | 557 | 0.000 |
| 558 | 0.557 | 558 | 0.573 | 558 | 0.220 | 558 | 0.000 |
| 558 | 0.630 | 559 | 0.220 | 559 | 0.363 | 559 | 0.320 |
|     |       | 560 | 0.073 | 560 | 0.127 | 560 | 0.150 |
|     |       | 561 | 0.243 | 561 | 0.313 | 561 | 0.413 |
|     |       | 562 | 0.460 | 562 | 0.627 | 562 | 0.770 |
|     |       | 563 | 0.337 | 563 | 0.470 | 563 | 0.637 |
|     |       | 564 | 0.097 | 564 | 0.067 | 564 | 0.207 |
|     |       | 565 | 0.000 | 565 | 0.000 | 565 | 0.000 |
|     |       | 566 | 0.103 | 566 | 0.000 | 566 | 0.000 |
|     |       | 567 | 0.427 | 567 | 0.217 | 567 | 0.457 |
|     |       | 568 | 2.490 | 568 | 0.233 | 568 | 0.337 |
|     |       |     |       | 569 | 0.033 | 569 | 0.000 |

| SL4-17 |        | SL4-18 |        | SL4-19 |        | SL4-20 |        |
|--------|--------|--------|--------|--------|--------|--------|--------|
| seqNum | Mean V |
| 100    | 0.913  | 100    | 0.833  | 100    | 1.073  | 100    | 1.186  |
| 101    | 0.423  | 101    | 0.670  | 101    | 0.297  | 101    | 0.396  |
| 102    | 0.320  | 102    | 0.000  | 102    | 0.253  | 102    | 0.468  |
| 103    | 0.000  | 103    | 0.000  | 103    | 0.000  | 103    | 0.290  |
| 104    | 0.337  | 104    | 0.047  | 104    | 0.077  | 104    | 0.143  |
| 105    | 0.203  | 105    | 0.177  | 105    | 0.050  | 105    | 0.239  |
| 106    | 0.120  | 106    | 0.253  | 106    | 0.127  | 106    | 0.020  |
| 107    | 0.273  | 107    | 0.540  | 107    | 0.117  | 107    | 0.259  |
| 108    | 0.223  | 108    | 0.013  | 108    | 0.147  | 108    | 0.170  |
| 109    | 0.373  | 109    | 0.410  | 109    | 0.233  | 109    | 0.123  |
| 110    | 0.327  | 110    | 0.350  | 110    | 0.247  | 110    | 0.203  |
| 111    | 0.207  | 111    | 0.323  | 111    | 0.167  | 111    | 0.393  |
| 112    | 0.000  | 112    | 0.000  | 112    | 0.000  | 112    | 0.000  |
| 113    | 1.377  | 113    | 0.543  | 113    | 1.453  | 113    | 1.260  |
| 114    | 0.347  | 114    | 0.210  | 114    | 0.133  | 114    | 0.763  |
| 115    | 2.090  | 115    | 1.483  | 115    | 2.083  | 115    | 1.637  |
| 116    | 0.270  | 116    | 0.223  | 116    | 0.360  | 116    | 1.270  |
| 117    | 0.000  | 117    | 0.000  | 117    | 0.047  | 117    | 0.320  |
| 118    | 0.153  | 118    | 0.190  | 118    | 0.017  | 118    | 0.283  |
| 119    | 0.213  | 119    | 0.160  | 119    | 0.307  | 119    | 0.407  |
| 120    | 0.323  | 120    | 0.397  | 120    | 0.703  | 120    | 0.757  |
| 121    | 0.433  | 121    | 0.057  | 121    | 0.507  | 121    | 0.890  |
| 122    | 0.303  | 122    | 0.130  | 122    | 0.170  | 122    | 0.457  |
| 123    | 0.117  | 123    | 0.050  | 123    | 0.337  | 123    | 0.290  |
| 124    | 0.030  | 124    | 0.007  | 124    | 0.137  | 124    | 0.193  |
| 125    | 0.083  | 125    | 0.473  | 125    | 0.157  | 125    | 0.670  |
| 126    | 0.000  | 126    | 0.000  | 126    | 0.000  | 126    | 0.057  |
| 127    | 0.177  | 127    | 0.187  | 127    | 0.047  | 127    | 0.103  |
| 128    | 0.133  | 128    | 0.437  | 128    | 0.107  | 128    | 0.457  |
| 129    | 0.160  | 129    | 0.367  | 129    | 0.180  | 129    | 0.313  |
| 130    | 0.000  | 130    | 0.000  | 130    | 0.000  | 130    | 0.023  |
| 131    | 0.000  | 131    | 0.000  | 131    | 0.000  | 131    | 0.000  |
| 132    | 0.013  | 132    | 0.000  | 132    | 0.000  | 132    | 0.053  |
| 133    | 0.320  | 133    | 0.180  | 133    | 0.047  | 133    | 0.130  |
| 134    | 1.063  | 134    | 0.587  | 134    | 0.783  | 134    | 0.667  |
| 135    | 0.463  | 135    | 0.430  | 135    | 0.230  | 135    | 0.577  |
| 136    | 0.287  | 136    | 0.603  | 136    | 0.410  | 136    | 0.567  |
| 137    | 0.207  | 137    | 0.450  | 137    | 0.297  | 137    | 0.227  |
| 138    | 0.050  | 138    | 0.300  | 138    | 0.097  | 138    | 0.207  |
| 139    | 0.300  | 139    | 0.343  | 139    | 0.350  | 139    | 0.327  |
| 140    | 0.107  | 140    | 0.303  | 140    | 0.133  | 140    | 0.387  |
| 141    | 0.180  | 141    | 0.517  | 141    | 0.197  | 141    | 0.577  |
| 142    | 0.047  | 142    | 0.050  | 142    | 0.000  | 142    | 0.037  |
| 143    | 0.000  | 143    | 0.000  | 143    | 0.000  | 143    | 0.203  |
| 144    | 0.340  | 144    | 0.123  | 144    | 0.540  | 144    | 1.043  |
| 145    | 1.390  | 145    | 1.093  | 145    | 1.050  | 145    | 1.343  |
| 146    | 0.923  | 146    | 0.907  | 146    | 0.240  | 146    | 0.753  |
| 147    | 0.000  | 147    | 0.293  | 147    | 0.000  | 147    | 0.000  |
| 148    | 0.747  | 148    | 0.677  | 148    | 0.113  | 148    | 0.233  |
| 149    | 0.190  | 149    | 0.130  | 149    | 0.073  | 149    | 0.283  |

|     |       |     |       |     |       |     |       |
|-----|-------|-----|-------|-----|-------|-----|-------|
| 150 | 0.233 | 150 | 0.183 | 150 | 0.137 | 150 | 0.373 |
| 151 | 0.000 | 151 | 0.000 | 151 | 0.240 | 151 | 0.150 |
| 152 | 0.000 | 152 | 0.000 | 152 | 0.000 | 152 | 0.137 |
| 153 | 0.000 | 153 | 0.000 | 153 | 0.000 | 153 | 0.310 |
| 154 | 0.000 | 154 | 0.000 | 154 | 0.000 | 154 | 0.257 |
| 155 | 0.000 | 155 | 0.000 | 155 | 0.000 | 155 | 0.210 |
| 156 | 0.053 | 156 | 0.077 | 156 | 0.000 | 156 | 0.203 |
| 157 | 0.237 | 157 | 0.153 | 157 | 0.170 | 157 | 0.207 |
| 158 | 0.030 | 158 | 0.110 | 158 | 0.067 | 158 | 0.173 |
| 159 | 0.000 | 159 | 0.000 | 159 | 0.087 | 159 | 0.117 |
| 160 | 0.073 | 160 | 0.060 | 160 | 0.023 | 160 | 0.143 |
| 161 | 0.827 | 161 | 0.837 | 161 | 1.240 | 161 | 0.910 |
| 162 | 0.140 | 162 | 0.363 | 162 | 0.337 | 162 | 0.487 |
| 163 | 0.170 | 163 | 0.357 | 163 | 0.203 | 163 | 0.403 |
| 164 | 0.020 | 164 | 0.130 | 164 | 0.050 | 164 | 0.303 |
| 165 | 0.000 | 165 | 0.000 | 165 | 0.000 | 165 | 0.113 |
| 166 | 0.000 | 166 | 0.000 | 166 | 0.113 | 166 | 0.077 |
| 167 | 0.050 | 167 | 0.207 | 167 | 0.143 | 167 | 0.213 |
| 168 | 0.000 | 168 | 0.000 | 168 | 0.000 | 168 | 0.083 |
| 169 | 0.100 | 169 | 0.080 | 169 | 0.043 | 169 | 0.043 |
| 170 | 0.193 | 170 | 0.087 | 170 | 0.130 | 170 | 0.130 |
| 171 | 0.120 | 171 | 0.063 | 171 | 0.133 | 171 | 0.170 |
| 172 | 0.413 | 172 | 0.577 | 172 | 0.350 | 172 | 0.150 |
| 173 | 0.793 | 173 | 0.513 | 173 | 0.447 | 173 | 0.523 |
| 174 | 0.507 | 174 | 0.510 | 174 | 0.377 | 174 | 0.407 |
| 175 | 0.357 | 175 | 0.183 | 175 | 0.077 | 175 | 0.197 |
| 176 | 0.113 | 176 | 0.100 | 176 | 0.037 | 176 | 0.273 |
| 177 | 0.120 | 177 | 0.087 | 177 | 0.003 | 177 | 0.013 |
| 178 | 0.060 | 178 | 0.080 | 178 | 0.023 | 178 | 0.047 |
| 179 | 0.710 | 179 | 0.233 | 179 | 0.353 | 179 | 0.300 |
| 180 | 0.270 | 180 | 0.303 | 180 | 0.157 | 180 | 0.193 |
| 181 | 0.163 | 181 | 0.183 | 181 | 0.197 | 181 | 0.070 |
| 182 | 0.097 | 182 | 0.213 | 182 | 0.197 | 182 | 0.043 |
| 183 | 0.220 | 183 | 0.340 | 183 | 0.040 | 183 | 0.107 |
| 184 | 0.140 | 184 | 0.180 | 184 | 0.057 | 184 | 0.063 |
| 185 | 0.357 | 185 | 0.283 | 185 | 0.327 | 185 | 0.257 |
| 186 | 0.267 | 186 | 0.143 | 186 | 0.260 | 186 | 0.183 |
| 187 | 0.113 | 187 | 0.273 | 187 | 0.047 | 187 | 0.127 |
| 188 | 0.653 | 188 | 0.430 | 188 | 0.507 | 188 | 0.507 |
| 189 | 0.340 | 189 | 0.197 | 189 | 0.323 | 189 | 0.193 |
| 190 | 0.233 | 190 | 0.273 | 190 | 0.263 | 190 | 0.220 |
| 191 | 0.103 | 191 | 0.150 | 191 | 0.163 | 191 | 0.210 |
| 192 | 0.207 | 192 | 0.113 | 192 | 0.087 | 192 | 0.277 |
| 193 | 0.273 | 193 | 0.047 | 193 | 0.103 | 193 | 0.380 |
| 194 | 0.227 | 194 | 0.260 | 194 | 0.353 | 194 | 0.480 |
| 195 | 0.437 | 195 | 0.283 | 195 | 0.450 | 195 | 0.507 |
| 196 | 0.593 | 196 | 0.307 | 196 | 0.537 | 196 | 0.367 |
| 197 | 0.713 | 197 | 0.487 | 197 | 0.653 | 197 | 0.473 |
| 198 | 0.417 | 198 | 0.417 | 198 | 0.467 | 198 | 0.383 |
| 199 | 0.023 | 199 | 0.113 | 199 | 0.087 | 199 | 0.253 |
| 200 | 0.043 | 200 | 0.290 | 200 | 0.030 | 200 | 0.077 |
| 201 | 0.097 | 201 | 0.193 | 201 | 0.003 | 201 | 0.053 |
| 202 | 0.117 | 202 | 0.227 | 202 | 0.000 | 202 | 0.253 |
| 203 | 0.593 | 203 | 0.340 | 203 | 0.610 | 203 | 0.290 |

|     |       |     |       |     |       |     |       |
|-----|-------|-----|-------|-----|-------|-----|-------|
| 204 | 0.123 | 204 | 0.127 | 204 | 0.000 | 204 | 0.147 |
| 205 | 0.047 | 205 | 0.257 | 205 | 0.017 | 205 | 0.143 |
| 206 | 0.417 | 206 | 0.320 | 206 | 0.253 | 206 | 0.340 |
| 207 | 0.250 | 207 | 0.193 | 207 | 0.247 | 207 | 0.323 |
| 208 | 0.240 | 208 | 0.147 | 208 | 0.250 | 208 | 0.517 |
| 209 | 0.687 | 209 | 0.537 | 209 | 0.397 | 209 | 0.600 |
| 210 | 0.370 | 210 | 0.347 | 210 | 0.413 | 210 | 0.100 |
| 211 | 0.007 | 211 | 0.203 | 211 | 0.000 | 211 | 0.043 |
| 212 | 0.027 | 212 | 0.057 | 212 | 0.000 | 212 | 0.117 |
| 213 | 0.000 | 213 | 0.120 | 213 | 0.000 | 213 | 0.033 |
| 214 | 0.040 | 214 | 0.287 | 214 | 0.000 | 214 | 0.133 |
| 215 | 0.073 | 215 | 0.213 | 215 | 0.147 | 215 | 0.267 |
| 216 | 0.240 | 216 | 0.370 | 216 | 0.353 | 216 | 0.330 |
| 217 | 0.150 | 217 | 0.103 | 217 | 0.000 | 217 | 0.180 |
| 218 | 0.177 | 218 | 0.107 | 218 | 0.023 | 218 | 0.187 |
| 219 | 0.330 | 219 | 0.287 | 219 | 0.157 | 219 | 0.250 |
| 220 | 0.243 | 220 | 0.313 | 220 | 0.053 | 220 | 0.370 |
| 221 | 0.130 | 221 | 0.203 | 221 | 0.113 | 221 | 0.387 |
| 222 | 0.127 | 222 | 0.290 | 222 | 0.030 | 222 | 0.180 |
| 223 | 0.303 | 223 | 0.463 | 223 | 0.127 | 223 | 0.167 |
| 224 | 0.440 | 224 | 0.190 | 224 | 0.173 | 224 | 0.170 |
| 225 | 0.173 | 225 | 0.073 | 225 | 0.000 | 225 | 0.000 |
| 226 | 0.047 | 226 | 0.160 | 226 | 0.000 | 226 | 0.000 |
| 227 | 0.303 | 227 | 0.193 | 227 | 0.093 | 227 | 0.063 |
| 228 | 0.517 | 228 | 0.370 | 228 | 0.980 | 228 | 0.433 |
| 229 | 0.663 | 229 | 0.353 | 229 | 0.690 | 229 | 0.320 |
| 230 | 0.000 | 230 | 0.003 | 230 | 0.000 | 230 | 0.000 |
| 231 | 0.523 | 231 | 0.453 | 231 | 0.267 | 231 | 0.460 |
| 232 | 0.527 | 232 | 0.473 | 232 | 0.387 | 232 | 0.497 |
| 233 | 0.000 | 233 | 0.080 | 233 | 0.000 | 233 | 0.073 |
| 234 | 0.610 | 234 | 0.450 | 234 | 0.047 | 234 | 0.417 |
| 235 | 0.000 | 235 | 0.013 | 235 | 0.000 | 235 | 0.000 |
| 236 | 0.560 | 236 | 0.353 | 236 | 0.337 | 236 | 0.587 |
| 237 | 0.657 | 237 | 0.813 | 237 | 0.897 | 237 | 0.953 |
| 238 | 0.000 | 238 | 0.000 | 238 | 0.167 | 238 | 0.353 |
| 239 | 0.367 | 239 | 0.303 | 239 | 0.203 | 239 | 0.213 |
| 240 | 0.053 | 240 | 0.097 | 240 | 0.060 | 240 | 0.143 |
| 241 | 0.000 | 241 | 0.060 | 241 | 0.027 | 241 | 0.013 |
| 242 | 0.000 | 242 | 0.040 | 242 | 0.100 | 242 | 0.190 |
| 243 | 0.000 | 243 | 0.037 | 243 | 0.130 | 243 | 0.120 |
| 244 | 0.017 | 244 | 0.007 | 244 | 0.103 | 244 | 0.067 |
| 245 | 0.060 | 245 | 0.190 | 245 | 0.170 | 245 | 0.073 |
| 246 | 0.000 | 246 | 0.000 | 246 | 0.000 | 246 | 0.107 |
| 247 | 0.000 | 247 | 0.000 | 247 | 0.000 | 247 | 0.113 |
| 248 | 0.000 | 248 | 0.000 | 248 | 0.000 | 248 | 0.057 |
| 249 | 0.087 | 249 | 0.137 | 249 | 0.223 | 249 | 1.460 |
| 250 | 0.040 | 250 | 0.000 | 250 | 0.000 | 250 | 0.317 |
| 251 | 0.013 | 251 | 0.280 | 251 | 0.000 | 251 | 0.097 |
| 252 | 0.000 | 252 | 0.000 | 252 | 0.000 | 252 | 0.000 |
| 253 | 1.363 | 253 | 0.073 | 253 | 1.333 | 253 | 0.170 |
| 254 | 0.020 | 254 | 0.520 | 254 | 0.017 | 254 | 0.050 |
| 255 | 0.000 | 255 | 0.563 | 255 | 0.000 | 255 | 0.000 |
| 256 | 0.440 | 256 | 0.647 | 256 | 0.000 | 256 | 0.377 |
| 257 | 0.437 | 257 | 0.800 | 257 | 0.173 | 257 | 0.967 |

|     |       |     |       |     |       |     |       |
|-----|-------|-----|-------|-----|-------|-----|-------|
| 258 | 1.223 | 258 | 0.500 | 258 | 1.123 | 258 | 0.990 |
| 259 | 0.150 | 259 | 0.000 | 259 | 0.377 | 259 | 0.273 |
| 260 | 0.030 | 260 | 0.000 | 260 | 0.277 | 260 | 0.003 |
| 261 | 0.000 | 261 | 0.000 | 261 | 0.123 | 261 | 0.053 |
| 262 | 0.507 | 262 | 0.073 | 262 | 0.807 | 262 | 0.173 |
| 263 | 0.070 | 263 | 0.037 | 263 | 0.150 | 263 | 0.253 |
| 264 | 0.080 | 264 | 0.003 | 264 | 0.177 | 264 | 0.150 |
| 265 | 0.083 | 265 | 0.127 | 265 | 0.513 | 265 | 0.260 |
| 266 | 0.663 | 266 | 0.143 | 266 | 1.423 | 266 | 0.393 |
| 267 | 0.000 | 267 | 0.000 | 267 | 0.000 | 267 | 0.100 |
| 268 | 0.663 | 268 | 0.367 | 268 | 0.583 | 268 | 0.273 |
| 269 | 0.387 | 269 | 0.087 | 269 | 0.733 | 269 | 0.263 |
| 270 | 0.780 | 270 | 0.737 | 270 | 0.257 | 270 | 0.063 |
| 271 | 0.083 | 271 | 0.080 | 271 | 0.000 | 271 | 0.177 |
| 272 | 0.000 | 272 | 0.010 | 272 | 0.000 | 272 | 0.010 |
| 273 | 0.007 | 273 | 0.053 | 273 | 0.010 | 273 | 0.000 |
| 274 | 0.047 | 274 | 0.000 | 274 | 0.153 | 274 | 0.053 |
| 275 | 0.257 | 275 | 0.000 | 275 | 0.147 | 275 | 0.307 |
| 276 | 0.050 | 276 | 0.000 | 276 | 0.137 | 276 | 0.133 |
| 277 | 0.053 | 277 | 0.007 | 277 | 0.090 | 277 | 0.027 |
| 278 | 0.467 | 278 | 0.173 | 278 | 0.420 | 278 | 0.030 |
| 279 | 0.130 | 279 | 0.027 | 279 | 0.143 | 279 | 0.080 |
| 280 | 0.300 | 280 | 0.117 | 280 | 0.103 | 280 | 0.333 |
| 281 | 1.297 | 281 | 1.113 | 281 | 1.207 | 281 | 1.673 |
| 282 | 1.593 | 282 | 1.280 | 282 | 1.440 | 282 | 1.643 |
| 283 | 1.257 | 283 | 0.967 | 283 | 0.880 | 283 | 0.967 |
| 284 | 1.400 | 284 | 1.463 | 284 | 1.563 | 284 | 1.690 |
| 285 | 1.173 | 285 | 1.103 | 285 | 1.270 | 285 | 1.373 |
| 286 | 0.920 | 286 | 0.763 | 286 | 1.040 | 286 | 1.297 |
| 287 | 1.327 | 287 | 1.487 | 287 | 1.707 | 287 | 2.133 |
| 288 | 0.683 | 288 | 0.807 | 288 | 0.917 | 288 | 1.180 |
| 289 | 0.023 | 289 | 0.013 | 289 | 0.013 | 289 | 0.113 |
| 290 | 0.000 | 290 | 0.000 | 290 | 0.000 | 290 | 0.000 |
| 291 | 0.337 | 291 | 0.063 | 291 | 0.130 | 291 | 0.010 |
| 292 | 0.063 | 292 | 0.000 | 292 | 0.030 | 292 | 0.000 |
| 293 | 0.063 | 293 | 0.000 | 293 | 0.110 | 293 | 0.190 |
| 294 | 0.283 | 294 | 0.047 | 294 | 0.290 | 294 | 0.107 |
| 295 | 1.090 | 295 | 0.780 | 295 | 0.670 | 295 | 0.537 |
| 296 | 1.300 | 296 | 1.460 | 296 | 1.077 | 296 | 1.207 |
| 297 | 0.207 | 297 | 0.313 | 297 | 0.643 | 297 | 0.640 |
| 298 | 0.267 | 298 | 0.317 | 298 | 0.163 | 298 | 0.037 |
| 299 | 0.507 | 299 | 0.177 | 299 | 0.327 | 299 | 0.017 |
| 300 | 0.770 | 300 | 0.230 | 300 | 0.337 | 300 | 0.020 |
| 301 | 0.543 | 301 | 0.210 | 301 | 0.417 | 301 | 0.000 |
| 302 | 0.303 | 302 | 0.260 | 302 | 0.300 | 302 | 0.023 |
| 303 | 0.117 | 303 | 0.320 | 303 | 0.020 | 303 | 0.000 |
| 304 | 0.017 | 304 | 0.063 | 304 | 0.000 | 304 | 0.100 |
| 305 | 0.000 | 305 | 0.000 | 305 | 0.000 | 305 | 0.000 |
| 306 | 0.657 | 306 | 0.237 | 306 | 0.283 | 306 | 0.210 |
| 307 | 1.280 | 307 | 1.057 | 307 | 1.160 | 307 | 0.747 |
| 308 | 1.517 | 308 | 1.410 | 308 | 1.457 | 308 | 0.977 |
| 309 | 0.737 | 309 | 0.513 | 309 | 0.843 | 309 | 0.923 |
| 310 | 0.630 | 310 | 0.327 | 310 | 0.770 | 310 | 0.747 |
| 311 | 0.587 | 311 | 0.553 | 311 | 0.500 | 311 | 0.543 |

|     |       |     |       |     |       |     |       |
|-----|-------|-----|-------|-----|-------|-----|-------|
| 312 | 0.513 | 312 | 0.427 | 312 | 0.440 | 312 | 0.400 |
| 313 | 0.510 | 313 | 0.367 | 313 | 0.213 | 313 | 0.320 |
| 314 | 0.430 | 314 | 0.503 | 314 | 0.267 | 314 | 0.220 |
| 315 | 0.020 | 315 | 0.037 | 315 | 0.077 | 315 | 0.263 |
| 316 | 0.000 | 316 | 0.000 | 316 | 0.003 | 316 | 0.237 |
| 317 | 0.000 | 317 | 0.000 | 317 | 0.000 | 317 | 0.203 |
| 318 | 0.000 | 318 | 0.000 | 318 | 0.000 | 318 | 0.043 |
| 319 | 0.000 | 319 | 0.000 | 319 | 0.327 | 319 | 0.400 |
| 320 | 0.600 | 320 | 0.517 | 320 | 0.850 | 320 | 0.557 |
| 321 | 0.023 | 321 | 0.127 | 321 | 0.097 | 321 | 0.037 |
| 322 | 0.497 | 322 | 0.350 | 322 | 0.530 | 322 | 0.110 |
| 323 | 0.140 | 323 | 0.210 | 323 | 0.090 | 323 | 0.000 |
| 324 | 0.400 | 324 | 0.280 | 324 | 0.307 | 324 | 0.120 |
| 325 | 0.000 | 325 | 0.000 | 325 | 0.250 | 325 | 0.187 |
| 326 | 0.000 | 326 | 0.000 | 326 | 0.043 | 326 | 0.000 |
| 327 | 0.000 | 327 | 0.000 | 327 | 0.000 | 327 | 0.000 |
| 328 | 0.117 | 328 | 0.040 | 328 | 0.197 | 328 | 0.243 |
| 329 | 0.000 | 329 | 0.000 | 329 | 0.000 | 329 | 0.000 |
| 330 | 0.400 | 330 | 0.053 | 330 | 0.817 | 330 | 0.803 |
| 331 | 0.797 | 331 | 0.477 | 331 | 1.317 | 331 | 1.177 |
| 332 | 0.770 | 332 | 0.527 | 332 | 1.047 | 332 | 0.970 |
| 333 | 0.767 | 333 | 0.707 | 333 | 0.813 | 333 | 0.730 |
| 334 | 0.163 | 334 | 0.060 | 334 | 0.257 | 334 | 0.190 |
| 335 | 0.027 | 335 | 0.030 | 335 | 0.070 | 335 | 0.050 |
| 336 | 0.017 | 336 | 0.067 | 336 | 0.073 | 336 | 0.083 |
| 337 | 0.210 | 337 | 0.170 | 337 | 0.290 | 337 | 0.317 |
| 338 | 0.223 | 338 | 0.153 | 338 | 0.053 | 338 | 0.017 |
| 339 | 0.173 | 339 | 0.000 | 339 | 0.203 | 339 | 0.017 |
| 340 | 0.210 | 340 | 0.123 | 340 | 0.057 | 340 | 0.060 |
| 341 | 0.320 | 341 | 0.263 | 341 | 0.253 | 341 | 0.133 |
| 342 | 0.060 | 342 | 0.033 | 342 | 0.023 | 342 | 0.077 |
| 343 | 0.133 | 343 | 0.000 | 343 | 0.050 | 343 | 0.123 |
| 344 | 0.697 | 344 | 0.357 | 344 | 0.913 | 344 | 0.690 |
| 345 | 0.247 | 345 | 0.190 | 345 | 0.187 | 345 | 0.077 |
| 346 | 0.740 | 346 | 0.630 | 346 | 0.783 | 346 | 0.377 |
| 347 | 0.727 | 347 | 0.613 | 347 | 0.677 | 347 | 0.323 |
| 348 | 0.627 | 348 | 0.643 | 348 | 0.833 | 348 | 0.460 |
| 349 | 0.000 | 349 | 0.000 | 349 | 0.037 | 349 | 0.000 |
| 350 | 0.137 | 350 | 0.007 | 350 | 0.027 | 350 | 0.050 |
| 351 | 0.473 | 351 | 0.240 | 351 | 0.423 | 351 | 0.173 |
| 352 | 0.070 | 352 | 0.053 | 352 | 0.027 | 352 | 0.023 |
| 353 | 0.013 | 353 | 0.080 | 353 | 0.000 | 353 | 0.047 |
| 354 | 0.337 | 354 | 0.447 | 354 | 0.193 | 354 | 0.757 |
| 355 | 3.647 | 355 | 3.210 | 355 | 3.230 | 355 | 3.370 |
| 356 | 0.263 | 356 | 0.190 | 356 | 0.307 | 356 | 0.643 |
| 357 | 0.383 | 357 | 0.190 | 357 | 0.327 | 357 | 0.490 |
| 358 | 0.417 | 358 | 0.320 | 358 | 0.307 | 358 | 0.540 |
| 359 | 0.400 | 359 | 0.373 | 359 | 0.297 | 359 | 0.303 |
| 360 | 0.660 | 360 | 0.620 | 360 | 0.667 | 360 | 0.460 |
| 361 | 0.050 | 361 | 0.340 | 361 | 0.000 | 361 | 0.000 |
| 362 | 0.377 | 362 | 0.387 | 362 | 0.283 | 362 | 0.250 |
| 363 | 0.220 | 363 | 0.170 | 363 | 0.080 | 363 | 0.057 |
| 364 | 0.033 | 364 | 0.123 | 364 | 0.027 | 364 | 0.033 |
| 365 | 0.000 | 365 | 0.173 | 365 | 0.000 | 365 | 0.000 |

|     |       |     |       |     |       |     |       |
|-----|-------|-----|-------|-----|-------|-----|-------|
| 366 | 0.143 | 366 | 0.137 | 366 | 0.000 | 366 | 0.047 |
| 367 | 0.000 | 367 | 0.000 | 367 | 0.010 | 367 | 0.030 |
| 368 | 0.000 | 368 | 0.000 | 368 | 0.000 | 368 | 0.000 |
| 369 | 0.000 | 369 | 0.000 | 369 | 0.000 | 369 | 0.043 |
| 370 | 0.000 | 370 | 0.000 | 370 | 0.000 | 370 | 0.000 |
| 371 | 0.000 | 371 | 0.000 | 371 | 0.000 | 371 | 0.007 |
| 372 | 0.080 | 372 | 0.047 | 372 | 0.040 | 372 | 0.090 |
| 373 | 0.540 | 373 | 0.590 | 373 | 0.403 | 373 | 0.377 |
| 374 | 1.337 | 374 | 1.540 | 374 | 1.183 | 374 | 1.107 |
| 375 | 4.060 | 375 | 3.637 | 375 | 3.483 | 375 | 3.213 |
| 376 | 2.753 | 376 | 2.483 | 376 | 2.510 | 376 | 2.153 |
| 377 | 3.217 | 377 | 2.770 | 377 | 2.713 | 377 | 2.500 |
| 378 | 0.060 | 378 | 0.020 | 378 | 0.080 | 378 | 0.100 |
| 379 | 0.000 | 379 | 0.020 | 379 | 0.030 | 379 | 0.000 |
| 380 | 0.000 | 380 | 0.000 | 380 | 0.000 | 380 | 0.000 |
| 381 | 0.000 | 381 | 0.000 | 381 | 0.000 | 381 | 0.000 |
| 382 | 0.000 | 382 | 0.000 | 382 | 0.000 | 382 | 0.000 |
| 383 | 0.000 | 383 | 0.000 | 383 | 0.000 | 383 | 0.000 |
| 384 | 0.000 | 384 | 0.000 | 384 | 0.000 | 384 | 0.000 |
| 385 | 0.000 | 385 | 0.000 | 385 | 0.000 | 385 | 0.197 |
| 386 | 0.057 | 386 | 0.053 | 386 | 0.060 | 386 | 0.150 |
| 387 | 0.817 | 387 | 1.190 | 387 | 0.963 | 387 | 0.743 |
| 388 | 0.353 | 388 | 1.263 | 388 | 0.267 | 388 | 0.040 |
| 389 | 1.860 | 389 | 1.673 | 389 | 1.387 | 389 | 1.383 |
| 390 | 0.267 | 390 | 0.343 | 390 | 0.323 | 390 | 0.283 |
| 391 | 0.030 | 391 | 0.083 | 391 | 0.083 | 391 | 0.087 |
| 392 | 0.013 | 392 | 0.063 | 392 | 0.000 | 392 | 0.003 |
| 393 | 0.027 | 393 | 0.047 | 393 | 0.077 | 393 | 0.170 |
| 394 | 0.057 | 394 | 0.007 | 394 | 0.020 | 394 | 0.027 |
| 395 | 0.100 | 395 | 0.107 | 395 | 0.127 | 395 | 0.103 |
| 396 | 0.437 | 396 | 0.397 | 396 | 0.443 | 396 | 0.370 |
| 397 | 0.840 | 397 | 0.707 | 397 | 0.660 | 397 | 0.623 |
| 398 | 0.210 | 398 | 0.120 | 398 | 0.237 | 398 | 0.227 |
| 399 | 0.107 | 399 | 0.160 | 399 | 0.200 | 399 | 0.230 |
| 400 | 0.210 | 400 | 0.180 | 400 | 0.257 | 400 | 0.177 |
| 401 | 0.300 | 401 | 0.223 | 401 | 0.260 | 401 | 0.230 |
| 402 | 0.487 | 402 | 0.600 | 402 | 0.327 | 402 | 0.280 |
| 403 | 0.727 | 403 | 0.637 | 403 | 0.587 | 403 | 0.473 |
| 404 | 0.720 | 404 | 0.557 | 404 | 0.573 | 404 | 0.350 |
| 405 | 0.543 | 405 | 0.483 | 405 | 0.387 | 405 | 0.237 |
| 406 | 0.960 | 406 | 0.747 | 406 | 1.290 | 406 | 0.940 |
| 407 | 0.000 | 407 | 0.420 | 407 | 0.073 | 407 | 0.000 |
| 408 | 0.340 | 408 | 0.297 | 408 | 0.323 | 408 | 0.393 |
| 409 | 0.700 | 409 | 0.690 | 409 | 0.737 | 409 | 0.667 |
| 410 | 0.867 | 410 | 1.237 | 410 | 0.767 | 410 | 0.633 |
| 411 | 0.657 | 411 | 0.613 | 411 | 0.877 | 411 | 0.730 |
| 412 | 0.567 | 412 | 0.427 | 412 | 0.797 | 412 | 0.610 |
| 413 | 0.587 | 413 | 0.547 | 413 | 0.710 | 413 | 0.653 |
| 414 | 0.750 | 414 | 0.673 | 414 | 0.850 | 414 | 0.860 |
| 415 | 0.563 | 415 | 0.453 | 415 | 0.610 | 415 | 0.717 |
| 416 | 0.687 | 416 | 0.533 | 416 | 0.700 | 416 | 0.797 |
| 417 | 0.780 | 417 | 0.637 | 417 | 0.793 | 417 | 0.883 |
| 418 | 0.617 | 418 | 0.573 | 418 | 0.540 | 418 | 0.563 |
| 419 | 0.803 | 419 | 0.620 | 419 | 0.740 | 419 | 0.710 |



|     |       |     |       |     |       |     |       |
|-----|-------|-----|-------|-----|-------|-----|-------|
| 420 | 0.520 | 420 | 0.350 | 420 | 0.407 | 420 | 0.340 |
| 421 | 0.000 | 421 | 0.260 | 421 | 0.220 | 421 | 0.000 |
| 422 | 0.387 | 422 | 0.180 | 422 | 0.657 | 422 | 0.723 |
| 423 | 0.570 | 423 | 0.470 | 423 | 0.770 | 423 | 0.763 |
| 424 | 0.360 | 424 | 0.243 | 424 | 0.497 | 424 | 0.407 |
| 425 | 0.410 | 425 | 0.290 | 425 | 0.413 | 425 | 0.347 |
| 426 | 0.197 | 426 | 0.243 | 426 | 0.117 | 426 | 0.087 |
| 427 | 0.000 | 427 | 0.000 | 427 | 0.000 | 427 | 0.000 |
| 428 | 0.077 | 428 | 0.297 | 428 | 0.000 | 428 | 0.043 |
| 429 | 0.500 | 429 | 0.510 | 429 | 0.193 | 429 | 0.327 |
| 430 | 0.883 | 430 | 0.917 | 430 | 0.470 | 430 | 0.617 |
| 431 | 0.883 | 431 | 1.170 | 431 | 0.627 | 431 | 0.713 |
| 432 | 0.983 | 432 | 1.060 | 432 | 0.670 | 432 | 0.847 |
| 433 | 1.007 | 433 | 0.970 | 433 | 0.823 | 433 | 0.813 |
| 434 | 0.927 | 434 | 1.053 | 434 | 0.957 | 434 | 0.950 |
| 435 | 0.197 | 435 | 0.253 | 435 | 0.417 | 435 | 0.457 |
| 436 | 0.187 | 436 | 0.253 | 436 | 0.303 | 436 | 0.470 |
| 437 | 0.233 | 437 | 0.217 | 437 | 0.193 | 437 | 0.223 |
| 438 | 0.467 | 438 | 0.450 | 438 | 0.183 | 438 | 0.180 |
| 439 | 0.320 | 439 | 0.323 | 439 | 0.253 | 439 | 0.167 |
| 440 | 0.037 | 440 | 0.000 | 440 | 0.000 | 440 | 0.000 |
| 441 | 0.367 | 441 | 0.180 | 441 | 0.000 | 441 | 0.053 |
| 442 | 0.000 | 442 | 0.000 | 442 | 0.000 | 442 | 0.017 |
| 443 | 0.000 | 443 | 0.000 | 443 | 0.000 | 443 | 0.000 |
| 444 | 0.177 | 444 | 0.097 | 444 | 0.000 | 444 | 0.027 |
| 445 | 0.887 | 445 | 0.957 | 445 | 0.720 | 445 | 0.590 |
| 446 | 0.453 | 446 | 0.607 | 446 | 0.957 | 446 | 0.980 |
| 447 | 0.863 | 447 | 1.180 | 447 | 1.550 | 447 | 1.603 |
| 448 | 0.730 | 448 | 1.003 | 448 | 1.010 | 448 | 1.090 |
| 449 | 1.100 | 449 | 1.143 | 449 | 1.413 | 449 | 1.357 |
| 450 | 0.647 | 450 | 0.563 | 450 | 0.777 | 450 | 0.653 |
| 451 | 0.017 | 451 | 0.000 | 451 | 0.033 | 451 | 0.000 |
| 452 | 0.000 | 452 | 0.010 | 452 | 0.050 | 452 | 0.100 |
| 453 | 0.103 | 453 | 0.297 | 453 | 0.373 | 453 | 0.370 |
| 454 | 0.400 | 454 | 0.537 | 454 | 0.763 | 454 | 0.733 |
| 455 | 0.853 | 455 | 1.103 | 455 | 0.977 | 455 | 0.920 |
| 456 | 0.713 | 456 | 0.930 | 456 | 0.913 | 456 | 0.820 |
| 457 | 0.587 | 457 | 0.753 | 457 | 0.927 | 457 | 0.710 |
| 458 | 0.013 | 458 | 0.087 | 458 | 0.017 | 458 | 0.037 |
| 459 | 0.090 | 459 | 0.160 | 459 | 0.070 | 459 | 0.077 |
| 460 | 0.043 | 460 | 0.133 | 460 | 0.060 | 460 | 0.117 |
| 461 | 0.000 | 461 | 0.033 | 461 | 0.030 | 461 | 0.057 |
| 462 | 0.000 | 462 | 0.023 | 462 | 0.000 | 462 | 0.000 |
| 463 | 0.000 | 463 | 0.000 | 463 | 0.000 | 463 | 0.000 |
| 464 | 0.000 | 464 | 0.000 | 464 | 0.000 | 464 | 0.007 |
| 465 | 0.643 | 465 | 0.573 | 465 | 0.333 | 465 | 0.507 |
| 466 | 0.923 | 466 | 0.860 | 466 | 0.717 | 466 | 0.857 |
| 467 | 1.367 | 467 | 1.697 | 467 | 1.300 | 467 | 1.230 |
| 468 | 1.337 | 468 | 1.213 | 468 | 1.143 | 468 | 1.200 |
| 469 | 0.987 | 469 | 0.933 | 469 | 0.970 | 469 | 0.953 |
| 470 | 1.210 | 470 | 1.197 | 470 | 1.200 | 470 | 1.157 |
| 471 | 0.770 | 471 | 0.690 | 471 | 0.810 | 471 | 0.670 |
| 472 | 0.773 | 472 | 0.843 | 472 | 0.993 | 472 | 0.747 |
| 473 | 0.827 | 473 | 1.000 | 473 | 1.170 | 473 | 0.880 |

|     |       |     |       |     |       |     |       |
|-----|-------|-----|-------|-----|-------|-----|-------|
| 474 | 0.553 | 474 | 0.777 | 474 | 0.817 | 474 | 0.630 |
| 475 | 0.000 | 475 | 0.313 | 475 | 0.167 | 475 | 0.000 |
| 476 | 0.217 | 476 | 0.077 | 476 | 0.120 | 476 | 0.163 |
| 477 | 0.927 | 477 | 0.873 | 477 | 0.960 | 477 | 0.773 |
| 478 | 0.247 | 478 | 0.157 | 478 | 0.253 | 478 | 0.230 |
| 479 | 0.057 | 479 | 0.000 | 479 | 0.000 | 479 | 0.000 |
| 480 | 0.337 | 480 | 0.290 | 480 | 0.133 | 480 | 0.143 |
| 481 | 0.770 | 481 | 0.717 | 481 | 0.503 | 481 | 0.577 |
| 482 | 0.837 | 482 | 0.713 | 482 | 0.640 | 482 | 0.763 |
| 483 | 0.977 | 483 | 0.693 | 483 | 0.637 | 483 | 0.757 |
| 484 | 0.850 | 484 | 0.773 | 484 | 0.313 | 484 | 0.457 |
| 485 | 0.220 | 485 | 0.287 | 485 | 0.000 | 485 | 0.047 |
| 486 | 0.197 | 486 | 0.310 | 486 | 0.043 | 486 | 0.073 |
| 487 | 0.293 | 487 | 0.420 | 487 | 0.270 | 487 | 0.290 |
| 488 | 0.637 | 488 | 0.670 | 488 | 0.543 | 488 | 0.660 |
| 489 | 0.020 | 489 | 0.003 | 489 | 0.000 | 489 | 0.067 |
| 490 | 0.000 | 490 | 0.000 | 490 | 0.000 | 490 | 0.000 |
| 491 | 0.000 | 491 | 0.047 | 491 | 0.000 | 491 | 0.000 |
| 492 | 0.010 | 492 | 0.083 | 492 | 0.100 | 492 | 0.090 |
| 493 | 0.047 | 493 | 0.010 | 493 | 0.157 | 493 | 0.153 |
| 494 | 0.057 | 494 | 0.067 | 494 | 0.023 | 494 | 0.030 |
| 495 | 0.000 | 495 | 0.000 | 495 | 0.000 | 495 | 0.000 |
| 496 | 0.197 | 496 | 0.250 | 496 | 0.173 | 496 | 0.110 |
| 497 | 0.693 | 497 | 0.703 | 497 | 0.863 | 497 | 0.723 |
| 498 | 0.367 | 498 | 0.547 | 498 | 0.070 | 498 | 0.157 |
| 499 | 0.040 | 499 | 0.053 | 499 | 0.000 | 499 | 0.000 |
| 500 | 0.343 | 500 | 0.437 | 500 | 0.300 | 500 | 0.377 |
| 501 | 0.353 | 501 | 0.367 | 501 | 0.280 | 501 | 0.290 |
| 502 | 0.543 | 502 | 0.313 | 502 | 0.383 | 502 | 0.443 |
| 503 | 0.437 | 503 | 0.047 | 503 | 0.503 | 503 | 0.500 |
| 504 | 0.977 | 504 | 0.820 | 504 | 0.833 | 504 | 1.000 |
| 505 | 0.607 | 505 | 0.623 | 505 | 0.253 | 505 | 0.490 |
| 506 | 0.823 | 506 | 0.777 | 506 | 0.687 | 506 | 0.787 |
| 507 | 0.143 | 507 | 0.113 | 507 | 0.087 | 507 | 0.130 |
| 508 | 0.007 | 508 | 0.070 | 508 | 0.000 | 508 | 0.000 |
| 509 | 0.000 | 509 | 0.000 | 509 | 0.033 | 509 | 0.043 |
| 510 | 0.433 | 510 | 0.463 | 510 | 0.273 | 510 | 0.207 |
| 511 | 0.160 | 511 | 0.140 | 511 | 0.000 | 511 | 0.007 |
| 512 | 0.500 | 512 | 0.480 | 512 | 0.260 | 512 | 0.310 |
| 513 | 0.053 | 513 | 0.023 | 513 | 0.013 | 513 | 0.040 |
| 514 | 0.000 | 514 | 0.000 | 514 | 0.000 | 514 | 0.000 |
| 515 | 0.000 | 515 | 0.000 | 515 | 0.000 | 515 | 0.000 |
| 516 | 0.000 | 516 | 0.000 | 516 | 0.000 | 516 | 0.000 |
| 517 | 0.000 | 517 | 0.020 | 517 | 0.020 | 517 | 0.037 |
| 518 | 0.000 | 518 | 0.000 | 518 | 0.000 | 518 | 0.000 |
| 519 | 0.000 | 519 | 0.000 | 519 | 0.000 | 519 | 0.023 |
| 520 | 0.000 | 520 | 0.047 | 520 | 0.000 | 520 | 0.187 |
| 521 | 0.047 | 521 | 0.270 | 521 | 0.077 | 521 | 0.253 |
| 522 | 0.337 | 522 | 0.530 | 522 | 0.230 | 522 | 0.347 |
| 523 | 0.000 | 523 | 0.007 | 523 | 0.000 | 523 | 0.000 |
| 524 | 0.053 | 524 | 0.043 | 524 | 0.097 | 524 | 0.237 |
| 525 | 0.227 | 525 | 0.390 | 525 | 0.383 | 525 | 0.427 |
| 526 | 0.000 | 526 | 0.000 | 526 | 0.017 | 526 | 0.090 |
| 527 | 0.000 | 527 | 0.000 | 527 | 0.000 | 527 | 0.030 |

|     |       |     |       |     |       |     |       |
|-----|-------|-----|-------|-----|-------|-----|-------|
| 528 | 0.000 | 528 | 0.000 | 528 | 0.000 | 528 | 0.030 |
| 529 | 0.020 | 529 | 0.100 | 529 | 0.000 | 529 | 0.097 |
| 530 | 0.000 | 530 | 0.033 | 530 | 0.000 | 530 | 0.000 |
| 531 | 0.533 | 531 | 0.800 | 531 | 0.513 | 531 | 0.693 |
| 532 | 0.063 | 532 | 0.120 | 532 | 0.257 | 532 | 0.193 |
| 533 | 0.270 | 533 | 0.343 | 533 | 0.383 | 533 | 0.243 |
| 534 | 0.330 | 534 | 0.593 | 534 | 0.643 | 534 | 0.437 |
| 535 | 0.137 | 535 | 0.210 | 535 | 0.273 | 535 | 0.170 |
| 536 | 0.023 | 536 | 0.080 | 536 | 0.127 | 536 | 0.087 |
| 537 | 0.000 | 537 | 0.087 | 537 | 0.177 | 537 | 0.000 |
| 538 | 0.333 | 538 | 0.563 | 538 | 0.473 | 538 | 0.633 |
| 539 | 0.327 | 539 | 0.520 | 539 | 0.413 | 539 | 0.463 |
| 540 | 0.233 | 540 | 0.210 | 540 | 0.247 | 540 | 0.260 |
| 541 | 0.027 | 541 | 0.023 | 541 | 0.017 | 541 | 0.013 |
| 542 | 0.020 | 542 | 0.137 | 542 | 0.260 | 542 | 0.000 |
| 543 | 0.333 | 543 | 0.373 | 543 | 0.543 | 543 | 0.617 |
| 544 | 0.713 | 544 | 0.697 | 544 | 0.790 | 544 | 0.757 |
| 545 | 0.707 | 545 | 0.683 | 545 | 0.800 | 545 | 0.800 |
| 546 | 0.650 | 546 | 0.907 | 546 | 0.770 | 546 | 0.797 |
| 547 | 0.040 | 547 | 0.690 | 547 | 0.583 | 547 | 0.277 |
| 548 | 1.007 | 548 | 1.137 | 548 | 1.180 | 548 | 1.233 |
| 549 | 0.060 | 549 | 0.000 | 549 | 0.170 | 549 | 0.020 |
| 550 | 0.017 | 550 | 0.000 | 550 | 0.027 | 550 | 0.010 |
| 551 | 0.063 | 551 | 0.000 | 551 | 0.043 | 551 | 0.037 |
| 552 | 0.297 | 552 | 0.150 | 552 | 0.170 | 552 | 0.103 |
| 553 | 0.640 | 553 | 0.670 | 553 | 0.417 | 553 | 0.283 |
| 554 | 0.713 | 554 | 0.637 | 554 | 0.417 | 554 | 0.460 |
| 555 | 0.040 | 555 | 0.007 | 555 | 0.003 | 555 | 0.000 |
| 556 | 0.000 | 556 | 0.000 | 556 | 0.000 | 556 | 0.000 |
| 557 | 0.000 | 557 | 0.000 | 557 | 0.033 | 557 | 0.073 |
| 558 | 0.000 | 558 | 0.033 | 558 | 0.113 | 558 | 0.000 |
| 559 | 0.550 | 559 | 0.480 | 559 | 0.303 | 559 | 0.227 |
| 560 | 0.157 | 560 | 0.083 | 560 | 0.110 | 560 | 0.037 |
| 561 | 0.360 | 561 | 0.307 | 561 | 0.327 | 561 | 0.150 |
| 562 | 0.600 | 562 | 0.543 | 562 | 0.543 | 562 | 0.490 |
| 563 | 0.377 | 563 | 0.507 | 563 | 0.487 | 563 | 0.450 |
| 564 | 0.147 | 564 | 0.107 | 564 | 0.203 | 564 | 0.143 |
| 565 | 0.000 | 565 | 0.053 | 565 | 0.000 | 565 | 0.007 |
| 566 | 0.000 | 566 | 0.127 | 566 | 0.000 | 566 | 0.000 |
| 567 | 0.393 | 567 | 0.350 | 567 | 0.240 | 567 | 0.650 |
| 568 | 0.000 | 568 | 0.763 | 568 | 0.667 | 568 | 0.000 |
|     |       | 569 | 0.543 | 569 | 0.000 | 569 | 0.187 |
