# Supplementary material
Source: publisher figshare collection journal article supplement (https://tandf.figshare.com/articles/dataset/_/6652289)
Supplement: Supplementary file 5 [file 2]

Archive with 6 entries (6 files):
- Supp Fig 1.pdf
- Supp Fig 2.pdf
- Supp Fig 3.pdf
- Supp Fig 4.pdf
- Supplementary Table 1.pdf
- Supplementary Table 2.pdf
