# Supplementary material
Source: publisher figshare collection journal article supplement (https://tandf.figshare.com/articles/dataset/_/6652289)

## Supplementary Figure 3

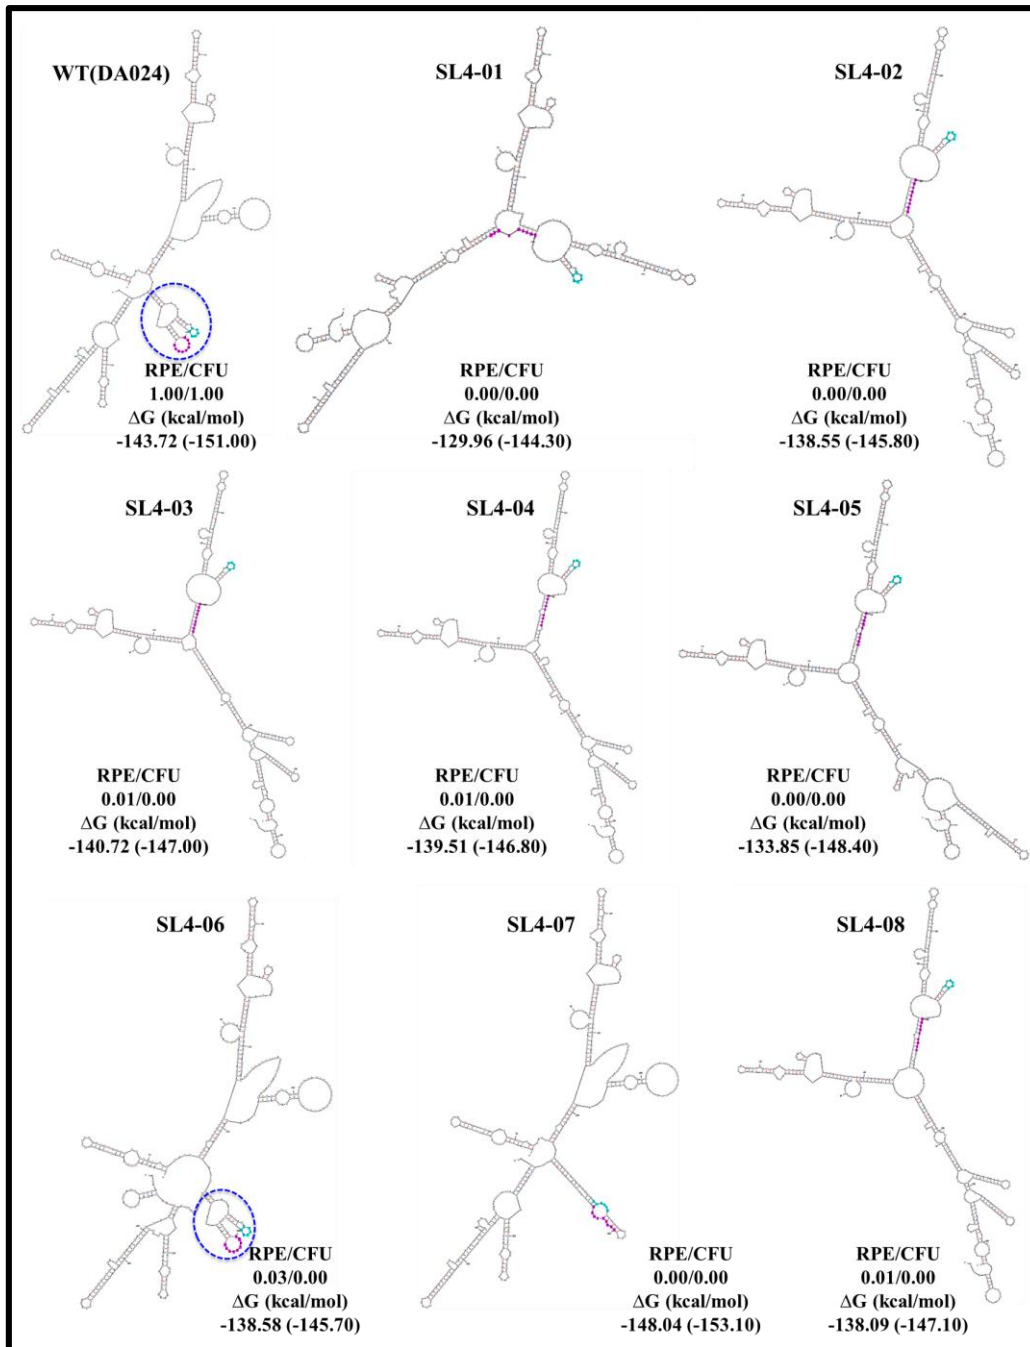

Supplement: Supplementary file 1 [file 2]

# Supplementary Figure 1

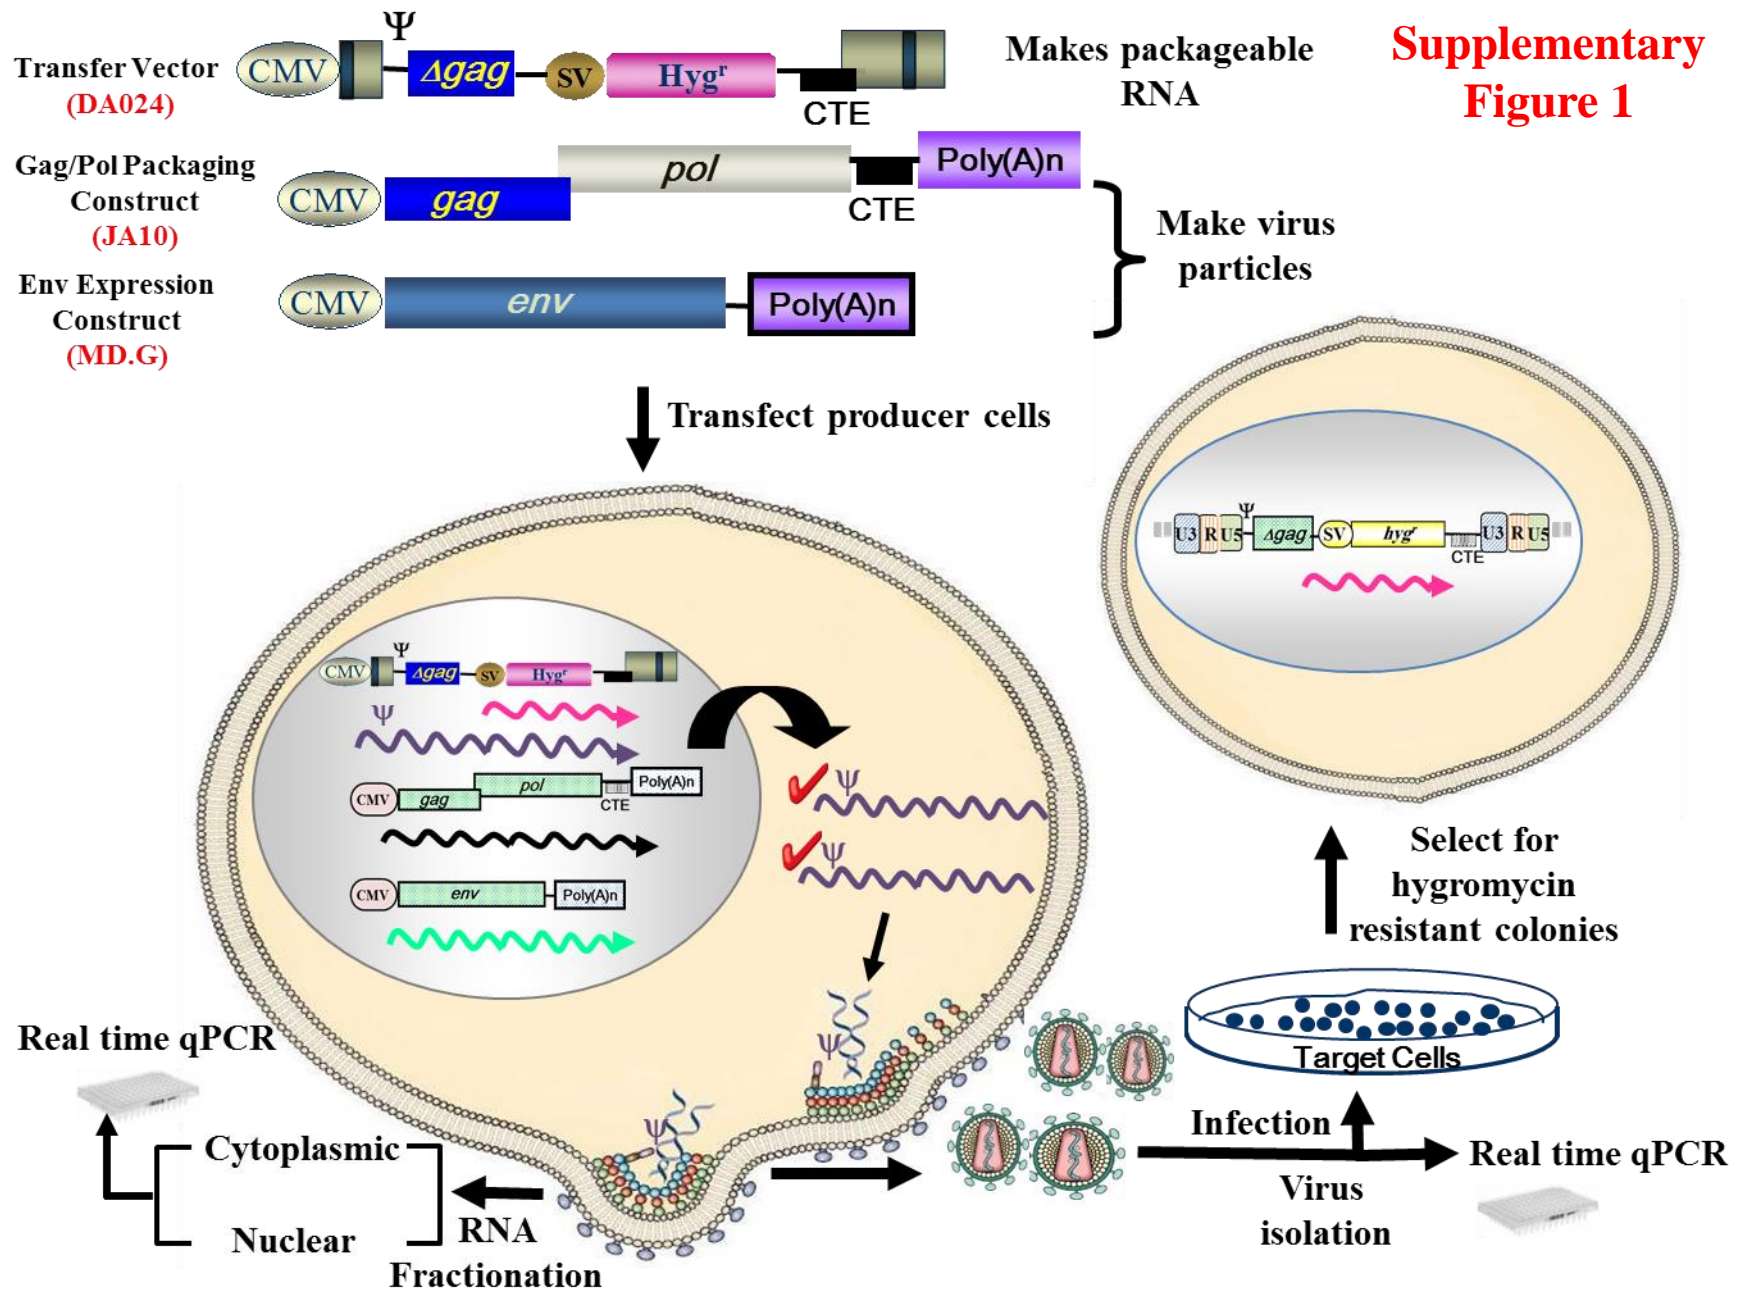

Supplement: Supplementary file 4 [file 2]

# Supplementary Figure 2

**A**

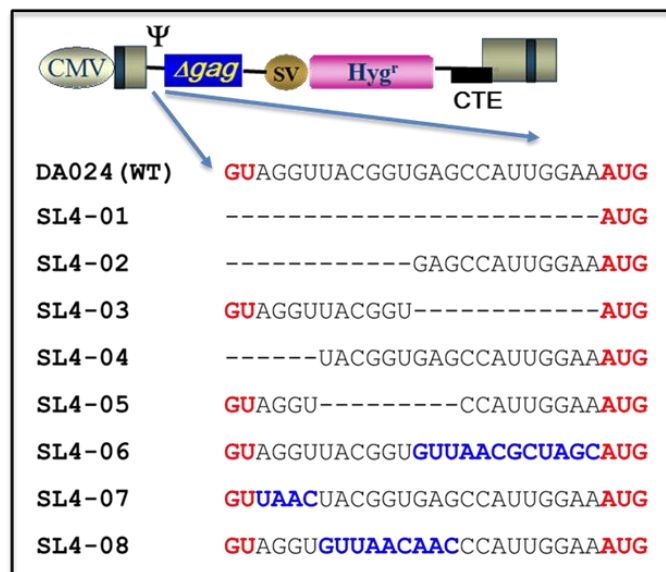

**B**

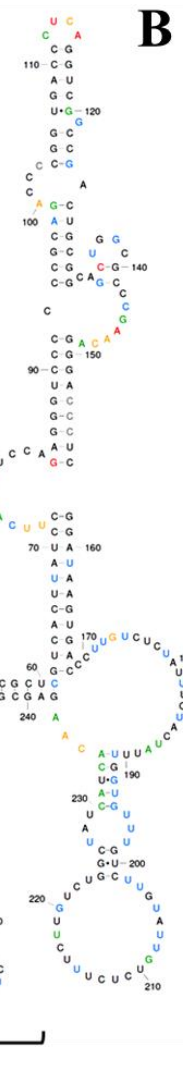

**C**

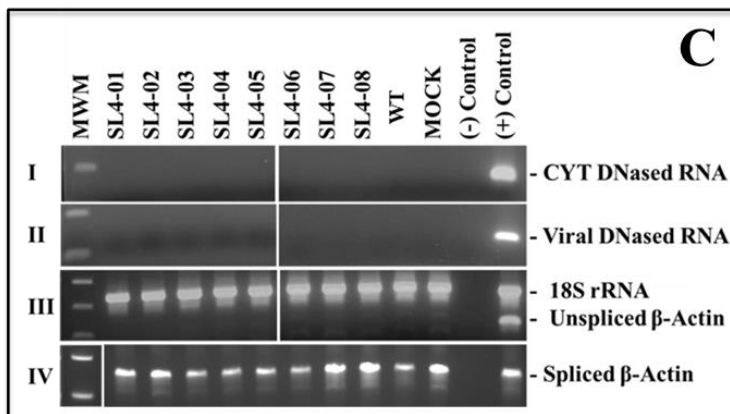

**D**

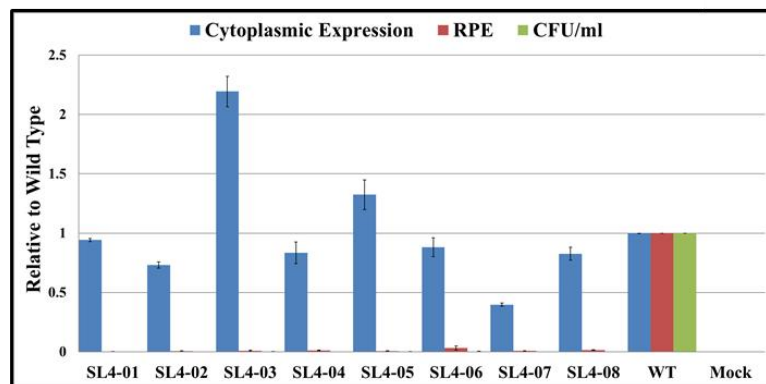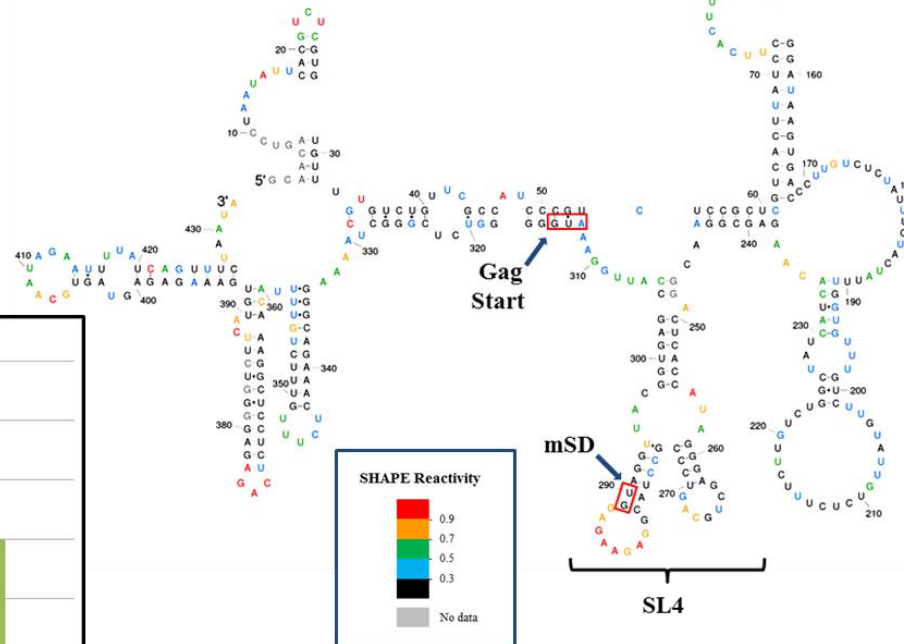

Supplement: Supplementary file 5 [file 2 › Supp Fig 2.pdf]

## Supplementary Figure 4

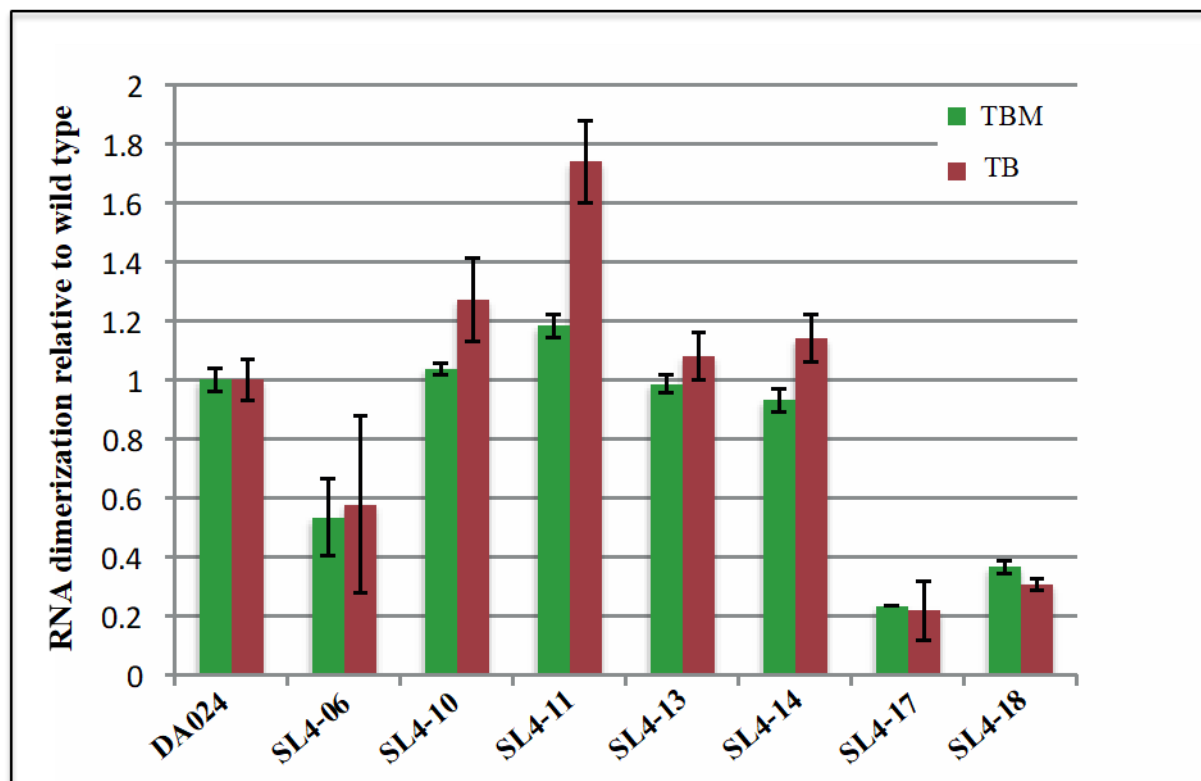

Supplement: Supplementary file 5 [file 2 › Supp Fig 4.pdf]
